# Supplementary material for: Biallelic variants in YRDC cause a developmental disorder with progeroid features
Source: Hum Genet. 2021 Sep 20;140(12):1679–93. doi: 10.1007/s00439-021-02347-3 (PMC8553732; doi:10.1007/s00439-021-02347-3)
Supplement: Supplementary file 7 — Supplementary file7 (XLSX 201 KB) [file 439_2021_2347_MOESM7_ESM.xlsx]

## Sheet: sheet
Supplementary Table S2. Single-cell RNA sequencing: de-regulated genes
gene_id	Gene_Name	Gene_Biotype	Gene_Length	MUT/MUT	controls	baseMean	SD	log2FoldChange	pvalue	padj	rank
ENSG00000135919	SERPINE2	protein_coding	8957	4.78575	68.8141	1.30015	0.686074	-3.84589	7.75145e-86	9.25523e-83	-327.326
ENSG00000011465	DCN	protein_coding	12548	4.58508	49.1965	1.3214	0.633883	-3.42354	4.89466e-63	8.34889e-61	-213.322
ENSG00000100234	TIMP3	protein_coding	4603	4.27932	30.6195	1.27043	0.589816	-2.839	4.35561e-73	1.30015e-70	-205.433
ENSG00000139329	LUM	protein_coding	2671	2.73222	18.0818	0.770497	0.627952	-2.72639	3.19645e-52	2.12031e-50	-140.397
ENSG00000173641	HSPB7	protein_coding	3910	2.41989	13.6609	0.667828	0.57329	-2.49703	2.57429e-56	2.79428e-54	-138.808
ENSG00000143387	CTSK	protein_coding	1824	3.71905	12.1378	1.09524	0.629618	-1.7065	1.45155e-59	1.92572e-57	-100.407
ENSG00000196154	S100A4	protein_coding	946	10.7674	35.3305	2.11623	0.732116	-1.71425	1.67939e-55	1.67099e-53	-93.8978
ENSG00000197614	MFAP5	protein_coding	3889	5.11917	14.2203	1.41187	0.680266	-1.47397	3.67911e-54	2.92857e-52	-78.7606
ENSG00000167157	PRRX2	protein_coding	1305	4.24503	12.6859	1.1296	0.752141	-1.57937	1.98323e-40	7.89327e-39	-62.7053
ENSG00000234745	HLA-B	protein_coding	3051	1.51914	3.88675	0.35239	0.340196	-1.35531	5.9645e-44	2.63763e-42	-58.5826
ENSG00000109846	CRYAB	protein_coding	4388	5.63938	12.7064	1.49345	0.65977	-1.17195	6.18828e-41	2.54786e-39	-47.1222
ENSG00000166147	FBN1	protein_coding	16057	3.27613	8.16636	1.0374	0.55296	-1.3177	3.60268e-35	9.55912e-34	-45.386
ENSG00000110031	LPXN	protein_coding	2467	1.83772	4.10967	0.516505	0.41932	-1.1611	1.03432e-39	3.98381e-38	-45.266
ENSG00000107984	DKK1	protein_coding	2221	12.3831	27.8951	2.2563	0.766636	-1.17164	2.99276e-39	1.08284e-37	-45.136
ENSG00000149131	SERPING1	protein_coding	3449	1.23927	2.82193	0.153605	0.300106	-1.1872	7.82563e-38	2.66966e-36	-44.0527
ENSG00000100292	HMOX1	protein_coding	2299	3.56551	8.87183	1.08193	0.607611	-1.31512	4.52141e-32	1.07971e-30	-41.2222
ENSG00000134333	LDHA	protein_coding	6038	24.3009	43.0229	3.11973	0.381616	-0.824093	1.89353e-45	8.69569e-44	-36.8557
ENSG00000174348	PODN	protein_coding	4899	1.04187	2.1423	0.029236	0.133944	-1.03999	2.50808e-35	6.80603e-34	-35.9845
ENSG00000077942	FBLN1	protein_coding	7285	1.40123	3.29316	0.269034	0.348059	-1.23278	5.09698e-29	9.36276e-28	-34.8786
ENSG00000166165	CKB	protein_coding	2383	1.33051	2.74607	0.22369	0.324217	-1.04539	8.13567e-34	2.11174e-32	-34.5917
ENSG00000145730	PAM	protein_coding	8846	3.08394	6.90065	0.970327	0.564502	-1.16196	1.26735e-29	2.44068e-28	-33.5772
ENSG00000150687	PRSS23	protein_coding	11444	4.70297	13.5034	1.31363	0.681334	-1.52167	1.63172e-22	1.80396e-21	-33.1533
ENSG00000169583	CLIC3	protein_coding	969	1.03831	1.89217	0.0297819	0.111755	-0.865806	1.39582e-37	4.62947e-36	-31.9094
ENSG00000137573	SULF1	protein_coding	9372	3.01017	12.7301	0.829336	0.693861	-2.08033	9.7821e-16	4.67193e-15	-31.2249
ENSG00000161281	COX7A1	protein_coding	586	1.27956	2.59751	0.183339	0.310853	-1.02148	3.07837e-31	6.68285e-30	-31.1671
ENSG00000166710	B2M	protein_coding	6079	23.7525	42.4543	3.07388	0.448614	-0.837833	2.40752e-36	7.01116e-35	-29.8423
ENSG00000104870	FCGRT	protein_coding	4052	1.39995	2.7174	0.268864	0.336472	-0.956853	1.18773e-31	2.67575e-30	-29.5909
ENSG00000105664	COMP	protein_coding	3092	1.00675	2.14218	0.00622242	0.0308877	-1.08937	2.82069e-27	4.67764e-26	-28.9225
ENSG00000167779	IGFBP6	protein_coding	1346	4.25794	9.2393	1.24137	0.633923	-1.11763	2.6861e-26	4.1118e-25	-28.5787
ENSG00000166780	BMERB1	protein_coding	3508	1.94412	4.00205	0.545738	0.475444	-1.04162	5.07529e-27	8.07987e-26	-27.389
ENSG00000119938	PPP1R3C	protein_coding	2541	1.30692	2.65664	0.2042	0.318633	-1.02343	7.45322e-27	1.17094e-25	-26.7399
ENSG00000042493	CAPG	protein_coding	2419	2.36385	4.80391	0.716002	0.515186	-1.02307	8.68053e-26	1.23388e-24	-25.6396
ENSG00000151914	DST	protein_coding	47883	3.53001	7.14089	1.11738	0.557415	-1.01643	8.10417e-26	1.18005e-24	-25.5036
ENSG00000143320	CRABP2	protein_coding	1082	1.59687	3.55371	0.360257	0.422854	-1.15408	2.77232e-22	2.92934e-21	-24.8788
ENSG00000101439	CST3	protein_coding	3615	3.61287	7.04397	1.14138	0.530086	-0.963243	1.67457e-26	2.59668e-25	-24.8286
ENSG00000163710	PCOLCE2	protein_coding	3533	1.1084	1.98907	0.0850491	0.17468	-0.84361	8.20397e-30	1.63259e-28	-24.5372
ENSG00000183255	PTTG1IP	protein_coding	3537	6.71588	13.1037	1.73024	0.616618	-0.964321	2.77533e-24	3.76561e-23	-22.7162
ENSG00000189320	FAM180A	protein_coding	2500	1.51066	2.61365	0.316657	0.387551	-0.790885	4.3425e-26	6.48117e-25	-20.0586
ENSG00000159251	ACTC1	protein_coding	2290	2.52416	5.22218	0.562483	0.689139	-1.04885	7.7766e-20	6.53891e-19	-20.0427
ENSG00000196139	AKR1C3	protein_coding	3911	1.01449	1.5816	0.012467	0.0585956	-0.640625	9.48211e-32	2.17724e-30	-19.8742
ENSG00000247627	MTND4P12	processed_pseudogene	1377	1.19998	2.5058	0.150655	0.225056	-1.06226	2.0626e-19	1.67533e-18	-19.849
ENSG00000079931	MOXD1	protein_coding	5223	1.52653	3.04312	0.346583	0.362549	-0.995294	3.20304e-20	2.77132e-19	-19.4027
ENSG00000049540	ELN	protein_coding	6542	1.1072	1.98871	0.0730871	0.206395	-0.844917	1.75913e-23	2.18791e-22	-19.2258
ENSG00000146674	IGFBP3	protein_coding	4571	21.3134	39.298	2.79263	0.76537	-0.882692	8.61605e-22	8.57297e-21	-18.5936
ENSG00000091986	CCDC80	protein_coding	13071	5.77659	10.4773	1.57193	0.609648	-0.858974	2.67285e-22	2.87512e-21	-18.5307
ENSG00000197747	S100A10	protein_coding	1012	6.58823	11.4419	1.76976	0.482596	-0.796367	8.08363e-24	1.02679e-22	-18.39
ENSG00000144063	MALL	protein_coding	2623	1.12052	1.79265	0.0867894	0.201728	-0.677921	4.42833e-27	7.14517e-26	-17.8658
ENSG00000175906	ARL4D	protein_coding	1578	1.54402	2.71076	0.351086	0.379967	-0.812006	1.09897e-22	1.27395e-21	-17.8309
ENSG00000183726	TMEM50A	protein_coding	3010	5.39495	8.56563	1.59409	0.432599	-0.666951	1.9678e-27	3.35651e-26	-17.8116
ENSG00000129009	ISLR	protein_coding	2632	2.11605	4.34878	0.60207	0.515035	-1.03924	1.56585e-17	9.99799e-17	-17.4646
ENSG00000157766	ACAN	protein_coding	10915	1.14492	2.16688	0.0785686	0.264903	-0.920373	2.79375e-18	1.95072e-17	-16.1561
ENSG00000181019	NQO1	protein_coding	2971	13.8108	23.782	2.49636	0.522013	-0.784068	3.73411e-21	3.53039e-20	-16.0168
ENSG00000164161	HHIP	protein_coding	11939	1.08038	2.0894	0.0513619	0.189902	-0.951548	3.45951e-17	2.1292e-16	-15.6634
ENSG00000119986	AVPI1	protein_coding	1375	1.40286	2.48669	0.277062	0.321453	-0.825859	2.74422e-19	2.16993e-18	-15.3293
ENSG00000135069	PSAT1	protein_coding	2206	3.05187	5.97322	0.91177	0.616769	-0.968814	3.35686e-16	1.75026e-15	-14.9915
ENSG00000168899	VAMP5	protein_coding	790	1.62712	2.83717	0.416286	0.363403	-0.802133	2.24578e-19	1.79964e-18	-14.9587
ENSG00000089327	FXYD5	protein_coding	2991	10.0659	15.7707	2.22373	0.411099	-0.647768	1.72824e-23	2.17212e-22	-14.7448
ENSG00000197756	RPL37A	protein_coding	6205	14.6271	28.2583	2.59341	0.405984	-0.950032	3.84097e-16	1.99396e-15	-14.6453
ENSG00000136826	KLF4	protein_coding	3662	1.06265	1.74102	0.0512431	0.129157	-0.71227	1.17747e-20	1.04918e-19	-14.1949
ENSG00000075223	SEMA3C	protein_coding	6100	1.31057	2.68662	0.21187	0.312444	-1.0356	5.57642e-14	2.06778e-13	-13.7255
ENSG00000197712	FAM114A1	protein_coding	4871	2.57844	3.99136	0.855046	0.427707	-0.630382	7.22492e-22	7.24921e-21	-13.327
ENSG00000185652	NTF3	protein_coding	2923	1.04111	1.49759	0.0298049	0.126284	-0.524523	6.70957e-26	9.8904e-25	-13.204
ENSG00000123358	NR4A1	protein_coding	7295	1.02827	1.70175	0.0222292	0.0969496	-0.726795	7.72025e-18	5.17864e-17	-12.4372
ENSG00000172331	BPGM	protein_coding	2539	1.64987	3.11389	0.412957	0.398509	-0.916365	3.46666e-14	1.31821e-13	-12.3343
ENSG00000072163	LIMS2	protein_coding	8487	1.122	1.77007	0.0943276	0.189484	-0.657728	2.28426e-19	1.81827e-18	-12.2609
ENSG00000175315	CST6	protein_coding	592	1.01089	1.41147	0.00949074	0.0484387	-0.481572	1.41341e-25	1.98543e-24	-11.9669
ENSG00000112419	PHACTR2	protein_coding	11224	2.57481	4.3714	0.815948	0.508736	-0.763631	2.79437e-16	1.48288e-15	-11.8773
ENSG00000170345	FOS	protein_coding	3186	3.8001	6.92571	1.12096	0.656844	-0.865923	1.97576e-14	7.78568e-14	-11.8668
ENSG00000017483	SLC38A5	protein_coding	4018	1.72393	3.0262	0.393587	0.498874	-0.81181	2.70982e-15	1.23024e-14	-11.8257
ENSG00000186847	KRT14	protein_coding	2255	1.00067	1.65855	0.000656411	0.00489143	-0.728956	8.99088e-17	5.18604e-16	-11.697
ENSG00000134107	BHLHE40	protein_coding	3516	1.312	2.6164	0.199785	0.337201	-0.995812	2.1076e-12	6.387e-12	-11.6273
ENSG00000213626	LBH	protein_coding	4532	1.75134	3.47885	0.443723	0.453312	-0.990154	1.92709e-12	5.86975e-12	-11.5997
ENSG00000115738	ID2	protein_coding	2213	3.28759	5.28574	1.06729	0.501503	-0.685076	3.70837e-17	2.25908e-16	-11.2564
ENSG00000105755	ETHE1	protein_coding	1590	1.728	2.76026	0.461213	0.396978	-0.675705	1.67316e-16	9.33528e-16	-10.6602
ENSG00000159228	CBR1	protein_coding	2450	2.6503	3.83346	0.870471	0.448836	-0.532489	1.10007e-20	9.87585e-20	-10.6277
ENSG00000128567	PODXL	protein_coding	6893	3.08957	5.17151	0.931225	0.623552	-0.743181	6.8909e-15	2.92802e-14	-10.5247
ENSG00000136153	LMO7	protein_coding	14367	2.40055	3.7542	0.748596	0.50671	-0.645137	7.27377e-17	4.25729e-16	-10.4114
ENSG00000142669	SH3BGRL3	protein_coding	876	18.1579	27.126	2.82871	0.391046	-0.579078	1.2384e-18	8.8542e-18	-10.3696
ENSG00000080823	MOK	protein_coding	10986	1.17412	2.26742	0.119002	0.246074	-0.949478	1.31747e-11	3.39753e-11	-10.3306
ENSG00000206503	HLA-A	protein_coding	2710	2.35144	3.68214	0.706093	0.523127	-0.647002	1.20097e-16	6.76398e-16	-10.3006
ENSG00000118680	MYL12B	protein_coding	1932	10.1082	14.1766	2.24068	0.393514	-0.487984	1.13241e-21	1.11743e-20	-10.2213
ENSG00000006016	CRLF1	protein_coding	2967	1.00496	1.38187	0.00461039	0.0255126	-0.459482	6.13926e-23	7.25769e-22	-10.206
ENSG00000164530	PI16	protein_coding	2305	1.0168	1.85217	0.0132144	0.0748553	-0.865183	1.77388e-12	5.4588e-12	-10.1668
ENSG00000140545	MFGE8	protein_coding	6807	2.77941	4.96361	0.76585	0.643693	-0.836611	2.54049e-12	7.50827e-12	-9.70058
ENSG00000082781	ITGB5	protein_coding	6515	1.52118	2.26647	0.340182	0.362538	-0.575255	2.39301e-17	1.49594e-16	-9.56134
ENSG00000163235	TGFA	protein_coding	4917	1.00205	1.49526	0.00189779	0.016643	-0.577444	4.39513e-17	2.63708e-16	-9.44527
ENSG00000001461	NIPAL3	protein_coding	9396	1.92398	3.14035	0.540926	0.45937	-0.706827	8.0737e-14	2.94801e-13	-9.25443
ENSG00000214078	CPNE1	protein_coding	3608	2.17149	3.32263	0.678508	0.430268	-0.613641	9.87243e-16	4.69629e-15	-9.20804
ENSG00000135926	TMBIM1	protein_coding	5093	3.54973	5.48025	1.11167	0.568941	-0.626531	8.40627e-15	3.4851e-14	-8.81867
ENSG00000065357	DGKA	protein_coding	10098	1.2475	1.88497	0.175908	0.279988	-0.595508	5.6594e-15	2.43947e-14	-8.48434
ENSG00000164920	OSR2	protein_coding	2930	1.06368	1.75138	0.0500425	0.13817	-0.71942	2.1855e-12	6.57301e-12	-8.38876
ENSG00000144476	ACKR3	protein_coding	2070	1.00739	1.54276	0.00628832	0.0434082	-0.614887	2.29233e-14	8.94457e-14	-8.38689
ENSG00000136810	TXN	protein_coding	1010	5.89934	8.53083	1.65659	0.491461	-0.532133	2.13832e-16	1.15527e-15	-8.33848
ENSG00000143369	ECM1	protein_coding	3360	2.93163	4.47654	0.954512	0.499493	-0.610682	4.29197e-14	1.6166e-13	-8.1632
ENSG00000138061	CYP1B1	protein_coding	5985	1.32112	2.52239	0.187472	0.361696	-0.933028	1.97572e-09	3.75638e-09	-8.12133
ENSG00000135318	NT5E	protein_coding	4533	3.75464	5.53227	1.20535	0.499223	-0.559198	3.96443e-15	1.75967e-14	-8.05347
ENSG00000167601	AXL	protein_coding	5134	8.90154	13.1803	2.09847	0.430579	-0.566256	7.51453e-15	3.15928e-14	-7.99785
ENSG00000177697	CD151	protein_coding	3894	7.50427	10.8712	1.8498	0.592052	-0.534726	1.42254e-15	6.63483e-15	-7.93905
ENSG00000117595	IRF6	protein_coding	4971	1.01379	1.47238	0.0105375	0.0710933	-0.538389	4.14946e-15	1.82821e-14	-7.74311
ENSG00000083857	FAT1	protein_coding	16167	1.60704	2.61084	0.374278	0.417139	-0.700105	1.11176e-11	2.91744e-11	-7.66895
ENSG00000128016	ZFP36	protein_coding	1976	1.30288	1.90156	0.196793	0.314203	-0.545471	1.49338e-14	6.0037e-14	-7.54159
ENSG00000176046	NUPR1	protein_coding	5674	4.70964	7.39008	1.3749	0.594052	-0.649973	2.79502e-12	8.13966e-12	-7.50954
ENSG00000180660	MAB21L1	protein_coding	2901	1.04117	1.42335	0.0341671	0.104513	-0.451086	2.49566e-17	1.55199e-16	-7.4893
ENSG00000215030	RPL13P12	processed_pseudogene	636	1.04892	1.39193	0.0394781	0.114234	-0.408181	5.95484e-19	4.50005e-18	-7.43914
ENSG00000101333	PLCB4	protein_coding	6900	1.04496	1.45366	0.0358557	0.114644	-0.476239	2.93687e-16	1.5516e-15	-7.397
ENSG00000005243	COPZ2	protein_coding	1866	1.75959	2.63858	0.464536	0.420749	-0.584521	2.33922e-13	8.16675e-13	-7.38304
ENSG00000049323	LTBP1	protein_coding	7348	1.97607	3.6611	0.510849	0.544451	-0.889645	5.9623e-09	1.077e-08	-7.31696
ENSG00000196975	ANXA4	protein_coding	11060	2.2205	3.12212	0.678195	0.463844	-0.491639	1.34603e-15	6.30259e-15	-7.31114
ENSG00000181072	CHRM2	protein_coding	8322	1.05488	1.63098	0.0385172	0.15048	-0.628661	3.05958e-12	8.80273e-12	-7.23862
ENSG00000141753	IGFBP4	protein_coding	2205	2.90708	4.31249	0.933319	0.509125	-0.568952	2.7497e-13	9.46149e-13	-7.14645
ENSG00000163815	CLEC3B	protein_coding	985	1.01446	1.29049	0.0103591	0.0755437	-0.347201	3.7551e-21	3.53039e-20	-7.09172
ENSG00000102312	PORCN	protein_coding	3011	1.14282	1.73036	0.102835	0.219684	-0.598465	2.40491e-12	7.16076e-12	-6.9535
ENSG00000188783	PRELP	protein_coding	5769	1.03261	1.43852	0.0247323	0.108983	-0.478281	6.66764e-15	2.84635e-14	-6.78013
ENSG00000122707	RECK	protein_coding	5569	2.12796	3.38982	0.633959	0.47286	-0.671739	9.24311e-11	2.13881e-10	-6.74035
ENSG00000164761	TNFRSF11B	protein_coding	2512	3.84469	8.31577	0.973474	0.812619	-1.11298	1.21118e-06	1.73192e-06	-6.58528
ENSG00000110651	CD81	protein_coding	7394	2.13714	3.28345	0.649559	0.447864	-0.619527	2.45373e-11	6.07834e-11	-6.57328
ENSG00000164543	STK17A	protein_coding	5683	1.84903	2.74302	0.50697	0.444908	-0.568998	3.22926e-12	9.22425e-12	-6.5383
ENSG00000184347	SLIT3	protein_coding	14260	1.19831	1.84659	0.135562	0.266296	-0.623862	6.23887e-11	1.47802e-10	-6.36645
ENSG00000153234	NR4A2	protein_coding	3963	1.04878	1.52697	0.0369891	0.130682	-0.541961	2.04374e-12	6.20923e-12	-6.33529
ENSG00000172819	RARG	protein_coding	5127	1.40903	2.14377	0.274832	0.339214	-0.605441	3.61748e-11	8.85097e-11	-6.32177
ENSG00000147027	TMEM47	protein_coding	4040	2.2049	3.33586	0.627424	0.542156	-0.597346	2.73769e-11	6.7398e-11	-6.30953
ENSG00000110203	FOLR3	protein_coding	1396	1.05903	1.4657	0.047334	0.13201	-0.468839	4.74291e-14	1.78083e-13	-6.2468
ENSG00000118523	CCN2	protein_coding	2338	7.85098	12.1212	1.74078	0.788502	-0.626584	1.15204e-10	2.61508e-10	-6.22732
ENSG00000124343	XG	protein_coding	3349	1.13145	1.59029	0.104273	0.183422	-0.49112	2.15721e-13	7.57561e-13	-6.22058
ENSG00000071967	CYBRD1	protein_coding	5172	3.17242	5.13943	1.00513	0.557944	-0.696025	1.58604e-09	3.07425e-09	-6.1248
ENSG00000169604	ANTXR1	protein_coding	8185	2.07942	3.00248	0.613296	0.472505	-0.529972	3.27653e-12	9.33693e-12	-6.08651
ENSG00000219438	TAFA5	protein_coding	3173	1.02986	1.30236	0.0231411	0.102388	-0.338675	1.43167e-18	1.01149e-17	-6.04337
ENSG00000196352	CD55	protein_coding	5908	1.65929	2.41209	0.422739	0.394017	-0.539717	1.15575e-11	3.01961e-11	-5.90296
ENSG00000133789	SWAP70	protein_coding	7192	1.92609	2.81706	0.562684	0.421932	-0.548517	2.26741e-11	5.67566e-11	-5.83867
ENSG00000204525	HLA-C	protein_coding	2507	1.90796	2.81543	0.546577	0.429308	-0.561325	5.91478e-11	1.40682e-10	-5.74126
ENSG00000010278	CD9	protein_coding	4165	1.80791	2.59972	0.483272	0.447627	-0.524036	1.24188e-11	3.21651e-11	-5.71509
ENSG00000182326	C1S	protein_coding	6462	1.64323	2.67881	0.391265	0.436389	-0.705061	7.95243e-09	1.41088e-08	-5.71064
ENSG00000197956	S100A6	protein_coding	971	19.4863	28.5411	2.86029	0.469745	-0.550581	8.21726e-11	1.91629e-10	-5.55276
ENSG00000085063	CD59	protein_coding	10569	20.8804	27.4377	2.96953	0.383133	-0.394009	9.74273e-15	4.0252e-14	-5.52058
ENSG00000107562	CXCL12	protein_coding	6077	14.7379	23.3965	2.47307	0.709906	-0.666764	8.26362e-09	1.45958e-08	-5.38934
ENSG00000117143	UAP1	protein_coding	3437	4.91046	6.93409	1.47049	0.513229	-0.497847	2.06917e-11	5.20125e-11	-5.3191
ENSG00000135404	CD63	protein_coding	2633	50.1619	67.1183	3.83928	0.402573	-0.420114	2.27907e-13	7.98008e-13	-5.31119
ENSG00000135047	CTSL	protein_coding	1852	5.72781	8.0955	1.62767	0.505229	-0.499137	2.59127e-11	6.39252e-11	-5.2841
ENSG00000183421	RIPK4	protein_coding	4016	1.00531	1.35177	0.00493979	0.0261144	-0.427211	4.39292e-13	1.45699e-12	-5.27915
ENSG00000140264	SERF2	protein_coding	7347	13.4735	19.2725	2.47052	0.508826	-0.516417	1.0447e-10	2.40342e-10	-5.15437
ENSG00000163191	S100A11	protein_coding	649	16.7782	22.2273	2.74222	0.390718	-0.405749	2.45337e-13	8.54032e-13	-5.11659
ENSG00000224259	LINC01133	lncRNA	3676	1.08141	1.47121	0.0644062	0.155479	-0.444085	3.32338e-12	9.4479e-12	-5.09739
ENSG00000095303	PTGS1	protein_coding	5784	1.0968	1.5912	0.0567063	0.20933	-0.53681	3.36351e-10	7.19718e-10	-5.08531
ENSG00000100300	TSPO	protein_coding	1422	7.77446	10.6107	1.94861	0.475168	-0.448702	4.77607e-12	1.32619e-11	-5.07973
ENSG00000248890	HHIP-AS1	lncRNA	2153	1.00491	1.28062	0.00435353	0.0313266	-0.349772	3.25158e-15	1.44865e-14	-5.06746
ENSG00000198832	SELENOM	protein_coding	3187	3.40413	4.70668	1.08707	0.524595	-0.467423	1.90498e-11	4.81896e-11	-5.01083
ENSG00000134202	GSTM3	protein_coding	4750	1.71363	2.45987	0.444519	0.403645	-0.521524	2.87195e-10	6.2461e-10	-4.97629
ENSG00000100243	CYB5R3	protein_coding	5797	7.22273	10.6724	1.7063	0.771123	-0.563263	1.75525e-09	3.36399e-09	-4.93174
ENSG00000170624	SGCD	protein_coding	10584	1.49862	2.10898	0.31311	0.38731	-0.492907	1.03077e-10	2.37595e-10	-4.92258
ENSG00000148120	AOPEP	protein_coding	10742	1.29472	1.76404	0.210655	0.286307	-0.446242	1.17197e-11	3.05532e-11	-4.87791
ENSG00000130707	ASS1	protein_coding	3018	1.20124	1.65592	0.148253	0.241992	-0.463113	3.79081e-11	9.23719e-11	-4.82622
ENSG00000119801	YPEL5	protein_coding	3421	2.13302	3.05458	0.641824	0.464552	-0.518082	5.24925e-10	1.09382e-09	-4.80775
ENSG00000163171	CDC42EP3	protein_coding	9964	3.0401	4.28236	0.986846	0.498863	-0.494289	2.64043e-10	5.77413e-10	-4.73446
ENSG00000169213	RAB3B	protein_coding	12780	4.35299	6.39396	1.31285	0.568573	-0.554702	3.29951e-09	6.14605e-09	-4.70473
ENSG00000177700	POLR2L	protein_coding	1126	6.49961	9.36106	1.75684	0.494554	-0.526319	1.18851e-09	2.35727e-09	-4.6974
ENSG00000163520	FBLN2	protein_coding	4818	1.18815	1.74474	0.108804	0.291204	-0.554292	3.96153e-09	7.31077e-09	-4.65724
ENSG00000107738	VSIR	protein_coding	5153	1.03582	1.37266	0.0296112	0.0986923	-0.406208	6.06564e-12	1.65351e-11	-4.55648
ENSG00000102683	SGCG	protein_coding	1624	1.06477	1.41203	0.0471404	0.150817	-0.407235	6.80119e-12	1.84141e-11	-4.54776
ENSG00000180875	GREM2	protein_coding	4176	1.94528	3.32798	0.514233	0.51634	-0.774668	1.76257e-06	2.47009e-06	-4.45732
ENSG00000111341	MGP	protein_coding	2887	1.06187	1.45935	0.0438431	0.155039	-0.458717	3.10313e-10	6.69214e-10	-4.36157
ENSG00000115641	FHL2	protein_coding	6626	4.58355	6.51913	1.41591	0.481604	-0.508214	2.9765e-09	5.57043e-09	-4.33318
ENSG00000100600	LGMN	protein_coding	3876	2.43232	3.62978	0.753568	0.506707	-0.577546	3.27908e-08	5.36331e-08	-4.3225
ENSG00000182809	CRIP2	protein_coding	4837	2.4571	3.54384	0.703134	0.585068	-0.528356	8.49188e-09	1.49768e-08	-4.26436
ENSG00000115414	FN1	protein_coding	17216	33.0128	46.2451	3.21136	0.756937	-0.486274	1.71001e-09	3.29314e-09	-4.26316
ENSG00000113389	NPR3	protein_coding	9979	1.19456	1.65123	0.138376	0.254334	-0.467062	8.22747e-10	1.65102e-09	-4.24314
ENSG00000134531	EMP1	protein_coding	7833	2.86618	3.98563	0.930113	0.496146	-0.475676	1.65724e-09	3.19667e-09	-4.17673
ENSG00000067113	PLPP1	protein_coding	1935	1.27375	1.81236	0.199675	0.268988	-0.508793	7.16902e-09	1.28526e-08	-4.14388
ENSG00000204387	SNHG32	lncRNA	1801	1.62581	2.22439	0.41919	0.342077	-0.45225	8.19955e-10	1.65097e-09	-4.10923
ENSG00000171223	JUNB	protein_coding	1830	1.24722	2.04605	0.173626	0.286362	-0.714124	1.79342e-06	2.51037e-06	-4.10358
ENSG00000187091	PLCD1	protein_coding	4314	1.20771	1.72112	0.147413	0.261408	-0.511068	1.34216e-08	2.2992e-08	-4.02323
ENSG00000137962	ARHGAP29	protein_coding	18370	1.35743	1.9249	0.242247	0.327953	-0.503907	1.07226e-08	1.86359e-08	-4.01599
ENSG00000155816	FMN2	protein_coding	9686	1.88712	2.69146	0.527771	0.442542	-0.512203	1.5664e-08	2.66043e-08	-3.99779
ENSG00000183801	OLFML1	protein_coding	3436	1.01204	1.28342	0.0095258	0.0637013	-0.34273	2.18258e-12	6.57301e-12	-3.99658
ENSG00000084234	APLP2	protein_coding	7463	6.59517	9.64679	1.65317	0.709678	-0.54864	5.42089e-08	8.69965e-08	-3.98638
ENSG00000126458	RRAS	protein_coding	1102	1.99734	2.77976	0.584082	0.443461	-0.476884	4.39625e-09	8.06316e-09	-3.98528
ENSG00000198959	TGM2	protein_coding	7948	1.39252	1.93991	0.225946	0.388749	-0.478288	5.30161e-09	9.62025e-09	-3.95812
ENSG00000126432	PRDX5	protein_coding	860	6.82749	9.0259	1.8458	0.392091	-0.402715	1.78875e-10	3.99209e-10	-3.92545
ENSG00000106853	PTGR1	protein_coding	3770	1.77706	2.40775	0.50432	0.370929	-0.438194	1.48855e-09	2.8994e-09	-3.86804
ENSG00000129353	SLC44A2	protein_coding	4952	1.92378	2.70814	0.528132	0.474012	-0.493354	1.55314e-08	2.64167e-08	-3.8525
ENSG00000105894	PTN	protein_coding	1622	1.53401	2.24264	0.342613	0.388653	-0.54789	9.69681e-08	1.50755e-07	-3.84255
ENSG00000124212	PTGIS	protein_coding	5570	1.00192	1.23649	0.00182692	0.013522	-0.303475	3.63948e-13	1.22755e-12	-3.77491
ENSG00000140092	FBLN5	protein_coding	4973	4.21135	5.77124	1.289	0.558387	-0.454598	5.32414e-09	9.64647e-09	-3.76123
ENSG00000118816	CCNI	protein_coding	3728	3.48997	4.91914	1.13437	0.485804	-0.495192	2.77829e-08	4.58187e-08	-3.74178
ENSG00000131018	SYNE1	protein_coding	46686	1.53761	2.28769	0.335807	0.398649	-0.573207	2.98051e-07	4.46516e-07	-3.74058
ENSG00000117450	PRDX1	protein_coding	1504	11.0259	14.4282	2.32928	0.380869	-0.387993	2.66593e-10	5.81923e-10	-3.71471
ENSG00000169184	MN1	protein_coding	7951	1.03411	1.24767	0.0265727	0.107539	-0.270838	2.67856e-14	1.03838e-13	-3.67584
ENSG00000124588	NQO2	protein_coding	11558	1.92442	2.64533	0.566904	0.412023	-0.459018	1.02621e-08	1.78875e-08	-3.66699
ENSG00000164418	GRIK2	protein_coding	7585	1.05826	1.45934	0.0432842	0.14562	-0.46362	1.3359e-08	2.29177e-08	-3.65065
ENSG00000255248	MIR100HG	lncRNA	28649	3.19256	4.33553	0.985833	0.586307	-0.441496	6.03402e-09	1.08831e-08	-3.62883
ENSG00000137767	SQOR	protein_coding	2941	1.18644	1.59774	0.138958	0.234092	-0.429394	3.98192e-09	7.33705e-09	-3.60687
ENSG00000104611	SH2D4A	protein_coding	4072	1.303	1.81031	0.20995	0.302945	-0.474403	3.07199e-08	5.05228e-08	-3.56399
ENSG00000166825	ANPEP	protein_coding	4865	2.71378	3.9719	0.737962	0.673952	-0.549525	3.62876e-07	5.41593e-07	-3.53907
ENSG00000198542	ITGBL1	protein_coding	6176	1.43331	1.9816	0.277591	0.36692	-0.467317	2.72168e-08	4.49472e-08	-3.53533
ENSG00000164733	CTSB	protein_coding	7317	21.0912	27.4825	2.96882	0.40889	-0.381874	8.63251e-10	1.7294e-09	-3.46125
ENSG00000035862	TIMP2	protein_coding	5633	2.28628	3.1734	0.733071	0.436611	-0.473025	6.47166e-08	1.02892e-07	-3.40057
ENSG00000156535	CD109	protein_coding	9782	2.03565	2.94119	0.582543	0.485758	-0.530911	4.63654e-07	6.80102e-07	-3.36269
ENSG00000178980	SELENOW	protein_coding	5248	2.36231	3.21812	0.75338	0.448306	-0.446019	2.91255e-08	4.79667e-08	-3.36108
ENSG00000122042	UBL3	protein_coding	4317	1.64648	2.2056	0.399154	0.406182	-0.421789	1.08199e-08	1.87775e-08	-3.35988
ENSG00000168938	PPIC	protein_coding	2082	2.53972	3.43412	0.814872	0.475191	-0.435268	2.20675e-08	3.67997e-08	-3.33252
ENSG00000185697	MYBL1	protein_coding	7239	1.19255	1.63121	0.141825	0.243376	-0.451888	5.02185e-08	8.09189e-08	-3.29839
ENSG00000172061	LRRC15	protein_coding	5940	1.05733	1.3635	0.0404673	0.149609	-0.366893	1.04406e-09	2.08463e-09	-3.29516
ENSG00000087460	GNAS	protein_coding	14145	4.84155	6.30628	1.47092	0.463759	-0.381319	2.99418e-09	5.59476e-09	-3.25026
ENSG00000127241	MASP1	protein_coding	13161	1.02775	1.2512	0.0220709	0.0951207	-0.283817	4.32707e-12	1.20713e-11	-3.22525
ENSG00000131981	LGALS3	protein_coding	2199	4.91273	6.34384	1.49442	0.451374	-0.36883	1.81752e-09	3.47776e-09	-3.22377
ENSG00000134285	FKBP11	protein_coding	4957	2.57295	3.51899	0.837194	0.449289	-0.451738	8.29501e-08	1.29807e-07	-3.19884
ENSG00000180879	SSR4	protein_coding	4564	5.37155	7.02489	1.57247	0.490578	-0.387137	7.12258e-09	1.27885e-08	-3.15415
ENSG00000124762	CDKN1A	protein_coding	3050	7.38309	10.4977	1.71859	0.749898	-0.507773	7.23009e-07	1.04639e-06	-3.11816
ENSG00000121769	FABP3	protein_coding	1398	1.05326	1.30252	0.0415979	0.129855	-0.306444	1.04765e-10	2.40556e-10	-3.05824
ENSG00000139132	FGD4	protein_coding	10629	1.01438	1.21679	0.0116148	0.0663033	-0.262486	2.43257e-12	7.22511e-12	-3.0485
ENSG00000162545	CAMK2N1	protein_coding	2605	1.1393	1.5779	0.110197	0.186999	-0.469856	4.28646e-07	6.31855e-07	-2.992
ENSG00000116005	PCYOX1	protein_coding	5864	1.63104	2.28704	0.408489	0.381305	-0.487687	1.00454e-06	1.44335e-06	-2.92516
ENSG00000074527	NTN4	protein_coding	4166	1.12459	1.5673	0.0800163	0.232404	-0.478875	7.79162e-07	1.12493e-06	-2.92515
ENSG00000117122	MFAP2	protein_coding	2712	2.07282	2.71905	0.62252	0.443233	-0.391505	3.77452e-08	6.14002e-08	-2.9062
ENSG00000105971	CAV2	protein_coding	6578	3.32933	4.99867	1.08344	0.5008	-0.586311	1.18306e-05	1.54043e-05	-2.88875
ENSG00000166770	ZNF667-AS1	lncRNA	12170	1.14182	1.41002	0.10221	0.216507	-0.304377	3.95938e-10	8.39698e-10	-2.86187
ENSG00000102804	TSC22D1	protein_coding	8586	1.73856	2.50191	0.452681	0.429834	-0.525134	3.8379e-06	5.20142e-06	-2.84408
ENSG00000198121	LPAR1	protein_coding	4159	2.19584	3.18204	0.684707	0.440912	-0.535183	5.50493e-06	7.3687e-06	-2.81466
ENSG00000136048	DRAM1	protein_coding	3940	1.33799	1.78454	0.234398	0.307497	-0.415487	1.68584e-07	2.57364e-07	-2.81417
ENSG00000124942	AHNAK	protein_coding	19466	3.00025	4.08921	0.972524	0.504132	-0.44674	6.50736e-07	9.46381e-07	-2.7638
ENSG00000173812	EIF1	protein_coding	3623	11.8498	14.7395	2.4002	0.387116	-0.314822	1.71499e-09	3.29741e-09	-2.75965
ENSG00000074842	MYDGF	protein_coding	1670	8.49715	10.9249	2.07483	0.378673	-0.362566	3.22687e-08	5.28517e-08	-2.71606
ENSG00000113739	STC2	protein_coding	6128	3.35078	5.00864	0.9714	0.652251	-0.579924	2.25811e-05	2.85612e-05	-2.69448
ENSG00000197635	DPP4	protein_coding	4678	1.20401	1.76152	0.142324	0.266028	-0.548974	1.48668e-05	1.90439e-05	-2.65033
ENSG00000124216	SNAI1	protein_coding	1705	1.29654	1.78498	0.204658	0.305361	-0.461236	2.70897e-06	3.7221e-06	-2.56779
ENSG00000163827	LRRC2	protein_coding	5634	1.14943	1.42143	0.0863365	0.246166	-0.306427	4.97759e-09	9.05981e-09	-2.54426
ENSG00000130340	SNX9	protein_coding	4655	1.90154	2.53256	0.524893	0.452218	-0.413426	7.36829e-07	1.0651e-06	-2.53539
ENSG00000021355	SERPINB1	protein_coding	3047	1.20955	1.5809	0.160781	0.229892	-0.386272	2.86244e-07	4.29906e-07	-2.52748
ENSG00000186469	GNG2	protein_coding	6379	1.3224	1.78157	0.205955	0.336913	-0.429986	1.43193e-06	2.02815e-06	-2.51287
ENSG00000197006	METTL9	protein_coding	6953	2.9498	3.96327	0.97073	0.480295	-0.426075	1.29839e-06	1.84776e-06	-2.50813
ENSG00000185201	IFITM2	protein_coding	1543	4.10719	5.3547	1.30145	0.476868	-0.382652	2.8027e-07	4.21995e-07	-2.5073
ENSG00000115306	SPTBN1	protein_coding	18473	2.09221	2.72582	0.631001	0.451435	-0.38166	3.02418e-07	4.52491e-07	-2.48819
ENSG00000086062	B4GALT1	protein_coding	4901	2.29811	3.04432	0.72748	0.447893	-0.405672	7.8624e-07	1.13378e-06	-2.4764
ENSG00000233608	TWIST2	protein_coding	1869	1.43825	1.86878	0.300987	0.323742	-0.37778	3.72146e-07	5.51979e-07	-2.42885
ENSG00000176454	LPCAT4	protein_coding	4702	1.52745	2.15268	0.345938	0.36954	-0.495006	1.28531e-05	1.66629e-05	-2.42107
ENSG00000109787	KLF3	protein_coding	6771	1.38138	1.87798	0.270252	0.312011	-0.44307	3.60881e-06	4.89651e-06	-2.41147
ENSG00000116209	TMEM59	protein_coding	9149	4.30153	5.52306	1.3311	0.521787	-0.360616	2.40727e-07	3.64756e-07	-2.38673
ENSG00000144746	ARL6IP5	protein_coding	2555	2.88193	3.67052	0.962819	0.425911	-0.348949	1.53061e-07	2.34001e-07	-2.37814
ENSG00000101000	PROCR	protein_coding	1697	1.20194	1.56987	0.147629	0.244349	-0.385274	6.7844e-07	9.8308e-07	-2.37656
ENSG00000071242	RPS6KA2	protein_coding	8251	1.34095	1.73141	0.211983	0.346973	-0.368689	3.61016e-07	5.39491e-07	-2.37527
ENSG00000255112	CHMP1B	protein_coding	3032	1.67731	2.21697	0.43647	0.377942	-0.402441	1.5751e-06	2.21516e-06	-2.33524
ENSG00000120885	CLU	protein_coding	6285	1.19893	1.63887	0.12944	0.280702	-0.450958	6.65396e-06	8.86699e-06	-2.33458
ENSG00000233276	GPX1	polymorphic_pseudogene	1183	2.43185	3.24113	0.788036	0.445013	-0.414441	2.50351e-06	3.45172e-06	-2.32147
ENSG00000147459	DOCK5	protein_coding	15989	1.7629	2.32468	0.476338	0.4008	-0.399084	1.60494e-06	2.25446e-06	-2.31251
ENSG00000176490	DIRAS1	protein_coding	3439	1.08231	1.38171	0.0620511	0.168195	-0.352337	2.9641e-07	4.44615e-07	-2.30009
ENSG00000179630	LACC1	protein_coding	4479	1.03882	1.32199	0.0309746	0.110192	-0.347766	2.51133e-07	3.7908e-07	-2.29529
ENSG00000148677	ANKRD1	protein_coding	1979	1.13515	1.4562	0.0955436	0.219265	-0.359334	4.52796e-07	6.6581e-07	-2.27965
ENSG00000142227	EMP3	protein_coding	1645	8.30481	10.3901	2.01981	0.439497	-0.323192	9.05784e-08	1.41373e-07	-2.27623
ENSG00000165949	IFI27	protein_coding	4147	1.00411	1.22656	0.0038486	0.0220034	-0.288701	1.58988e-08	2.69648e-08	-2.25147
ENSG00000101608	MYL12A	protein_coding	3245	29.9956	46.7194	3.27496	0.511377	-0.639269	0.000325913	0.000384906	-2.22907
ENSG00000101825	MXRA5	protein_coding	9804	1.11755	1.49397	0.0857085	0.202393	-0.418816	5.59698e-06	7.48353e-06	-2.19964
ENSG00000196998	WDR45	protein_coding	4691	1.44161	1.82787	0.29712	0.334544	-0.342486	3.91509e-07	5.79259e-07	-2.1944
ENSG00000014914	MTMR11	protein_coding	4572	1.11244	1.40869	0.0880387	0.179482	-0.340628	3.9738e-07	5.87218e-07	-2.18029
ENSG00000075785	RAB7A	protein_coding	2658	7.08047	8.71492	1.89683	0.38117	-0.299643	5.37868e-08	8.64354e-08	-2.1782
ENSG00000134259	NGF	protein_coding	1061	1.83106	2.51357	0.49174	0.449286	-0.457059	1.90029e-05	2.41378e-05	-2.15786
ENSG00000140105	WARS1	protein_coding	6356	3.08823	4.16367	1.00783	0.496664	-0.431076	1.00869e-05	1.32058e-05	-2.15376
ENSG00000118495	PLAGL1	protein_coding	8733	1.37687	1.82729	0.251249	0.339529	-0.408312	6.09833e-06	8.13565e-06	-2.12926
ENSG00000104388	RAB2A	protein_coding	5592	3.99369	5.6665	1.26626	0.491964	-0.504736	6.28703e-05	7.77093e-05	-2.12068
ENSG00000092148	HECTD1	protein_coding	12557	1.80109	2.39977	0.49138	0.420825	-0.41403	8.341e-06	1.10046e-05	-2.10277
ENSG00000113732	ATP6V0E1	protein_coding	1609	8.08881	10.2224	2.00618	0.426038	-0.337731	6.61027e-07	9.60179e-07	-2.08711
ENSG00000170545	SMAGP	protein_coding	3083	1.83245	2.37778	0.525432	0.392234	-0.375844	2.83279e-06	3.8744e-06	-2.0851
ENSG00000163683	SMIM14	protein_coding	6527	1.72845	2.29539	0.472715	0.376054	-0.409267	8.07e-06	1.06706e-05	-2.08445
ENSG00000105640	RPL18A	protein_coding	3493	2.88679	4.27112	0.945205	0.463468	-0.565147	0.000218669	0.000259792	-2.06856
ENSG00000260027	HOXB7	protein_coding	1520	1.11537	1.34282	0.0903918	0.18024	-0.267744	1.93488e-08	3.24472e-08	-2.0652
ENSG00000128965	CHAC1	protein_coding	2051	1.25035	1.66179	0.166275	0.301266	-0.410409	9.67305e-06	1.2678e-05	-2.05797
ENSG00000276168	RN7SL1	misc_RNA	299	1.60558	2.18606	0.36569	0.42285	-0.445242	2.54665e-05	3.21427e-05	-2.04545
ENSG00000086289	EPDR1	protein_coding	2780	1.03507	1.23232	0.0274004	0.108108	-0.251657	7.6138e-09	1.35588e-08	-2.04305
ENSG00000128595	CALU	protein_coding	6342	20.9949	27.0791	2.90653	0.553745	-0.367143	2.8323e-06	3.8744e-06	-2.03686
ENSG00000041880	PARP3	protein_coding	2928	1.56656	2.15268	0.364328	0.383379	-0.458539	4.09242e-05	5.10057e-05	-2.01208
ENSG00000078401	EDN1	protein_coding	2035	1.1303	1.41167	0.0836625	0.234981	-0.320698	6.67286e-07	9.68091e-07	-1.98053
ENSG00000139433	GLTP	protein_coding	2747	1.90128	2.39648	0.562806	0.381597	-0.333946	1.26889e-06	1.80795e-06	-1.96914
ENSG00000168653	NDUFS5	protein_coding	548	3.21374	4.13665	1.05817	0.466197	-0.36421	3.93328e-06	5.32464e-06	-1.96865
ENSG00000011454	RABGAP1	protein_coding	9151	1.19098	1.61498	0.142987	0.233641	-0.439368	3.45871e-05	4.32882e-05	-1.96006
ENSG00000130844	ZNF331	protein_coding	8785	1.12238	1.47144	0.0957796	0.186191	-0.390671	1.02205e-05	1.33515e-05	-1.94966
ENSG00000156976	EIF4A2	protein_coding	6130	3.11059	4.02054	1.00923	0.508725	-0.370203	5.61287e-06	7.49638e-06	-1.94387
ENSG00000154122	ANKH	protein_coding	12695	1.08358	1.36586	0.0682867	0.145757	-0.334004	1.52e-06	2.14778e-06	-1.94329
ENSG00000104419	NDRG1	protein_coding	9823	1.15518	1.4513	0.120439	0.205157	-0.329233	1.55021e-06	2.1853e-06	-1.91272
ENSG00000225830	ERCC6	protein_coding	17716	1.25415	1.71241	0.184472	0.270137	-0.449325	5.79915e-05	7.17532e-05	-1.90363
ENSG00000120738	EGR1	protein_coding	3137	1.62646	2.12591	0.366173	0.44084	-0.386344	1.21388e-05	1.57712e-05	-1.8992
ENSG00000125995	ROMO1	protein_coding	702	2.72614	3.57839	0.866911	0.515994	-0.392451	1.45496e-05	1.86798e-05	-1.89834
ENSG00000229847	EMX2OS	lncRNA	8918	1.27196	1.63975	0.182274	0.301248	-0.366419	7.86113e-06	1.0406e-05	-1.87039
ENSG00000120913	PDLIM2	protein_coding	12388	3.05519	3.80774	1.01533	0.451721	-0.317674	1.42593e-06	2.02205e-06	-1.85709
ENSG00000140941	MAP1LC3B	protein_coding	5037	3.53004	4.49586	1.12291	0.536171	-0.348913	5.42104e-06	7.27272e-06	-1.83735
ENSG00000067560	RHOA	protein_coding	2498	16.4535	19.7234	2.74285	0.349855	-0.261512	1.26085e-07	1.93752e-07	-1.80426
ENSG00000165030	NFIL3	protein_coding	2055	1.1811	1.50662	0.130071	0.245564	-0.351187	1.21291e-05	1.57712e-05	-1.7265
ENSG00000138279	ANXA7	protein_coding	2862	3.55431	4.34663	1.18781	0.416065	-0.290325	1.39189e-06	1.97611e-06	-1.70026
ENSG00000166946	CCNDBP1	protein_coding	6655	2.30455	2.93425	0.74481	0.432289	-0.348503	1.33093e-05	1.71612e-05	-1.69925
ENSG00000114738	MAPKAPK3	protein_coding	3915	1.3973	1.8315	0.252065	0.367158	-0.390387	5.14815e-05	6.37644e-05	-1.67412
ENSG00000244509	APOBEC3C	protein_coding	2644	1.77413	2.24981	0.499463	0.373256	-0.342689	1.41707e-05	1.82325e-05	-1.66157
ENSG00000152377	SPOCK1	protein_coding	6200	2.59524	3.62553	0.794702	0.549924	-0.482326	0.000374997	0.000440262	-1.65244
ENSG00000051108	HERPUD1	protein_coding	5062	5.50101	6.91031	1.55959	0.5558	-0.329054	1.02045e-05	1.33453e-05	-1.64237
ENSG00000125968	ID1	protein_coding	1233	3.95003	4.98606	1.23607	0.536999	-0.336036	1.4881e-05	1.90439e-05	-1.62217
ENSG00000099246	RAB18	protein_coding	6223	4.99675	8.30052	1.40241	0.63745	-0.732213	0.00661586	0.00718122	-1.59579
ENSG00000183087	GAS6	protein_coding	6015	1.22873	1.60852	0.160167	0.271648	-0.388566	7.95928e-05	9.7872e-05	-1.59278
ENSG00000116171	SCP2	protein_coding	8253	2.56423	3.21716	0.824481	0.469576	-0.327263	1.4549e-05	1.86798e-05	-1.58302
ENSG00000115226	FNDC4	protein_coding	1937	1.14038	1.3678	0.100152	0.222843	-0.262337	1.06233e-06	1.52454e-06	-1.56713
ENSG00000106624	AEBP1	protein_coding	4971	1.40163	1.82316	0.234811	0.395364	-0.379339	8.04534e-05	9.88285e-05	-1.55319
ENSG00000144959	NCEH1	protein_coding	4808	1.82063	2.41115	0.489586	0.450265	-0.40528	0.000147601	0.000177657	-1.55259
ENSG00000136156	ITM2B	protein_coding	10661	2.51846	3.10904	0.793089	0.492516	-0.303929	7.83736e-06	1.0386e-05	-1.55181
ENSG00000164713	BRI3	protein_coding	5139	1.35502	1.66513	0.256995	0.282911	-0.297321	7.28399e-06	9.68495e-06	-1.52752
ENSG00000155324	GRAMD2B	protein_coding	5051	1.49957	1.97023	0.33315	0.359968	-0.393819	0.000140595	0.000169909	-1.517
ENSG00000089220	PEBP1	protein_coding	1514	8.2449	12.957	2.00685	0.437835	-0.652158	0.00472936	0.00517111	-1.5164
ENSG00000138744	NAAA	protein_coding	4416	1.14463	1.38492	0.115341	0.185711	-0.274927	3.40877e-06	4.63561e-06	-1.50314
ENSG00000117318	ID3	protein_coding	1496	9.0419	11.3909	2.06684	0.540233	-0.333181	3.17477e-05	3.99018e-05	-1.49874
ENSG00000050405	LIMA1	protein_coding	6317	3.73716	4.69179	1.1951	0.513501	-0.328197	3.03847e-05	3.8229e-05	-1.48258
ENSG00000133639	BTG1	protein_coding	4855	1.63917	2.13922	0.425973	0.358442	-0.384122	0.000138675	0.000167759	-1.48194
ENSG00000023191	RNH1	protein_coding	7374	6.43563	8.40758	1.68947	0.616543	-0.385611	0.000147256	0.00017742	-1.47763
ENSG00000180628	PCGF5	protein_coding	8312	1.33597	1.7149	0.241608	0.294425	-0.360236	9.1341e-05	0.000111629	-1.45511
ENSG00000130313	PGLS	protein_coding	2840	1.75195	2.16531	0.490273	0.36352	-0.305611	2.11289e-05	2.67813e-05	-1.42877
ENSG00000204381	LAYN	protein_coding	3144	1.66292	2.18787	0.438175	0.360028	-0.395807	0.000247004	0.000292873	-1.42779
ENSG00000163069	SGCB	protein_coding	4541	3.20202	4.16262	1.06631	0.460416	-0.378508	0.000188323	0.000224858	-1.40998
ENSG00000151414	NEK7	protein_coding	5454	3.3717	4.45909	1.03862	0.579107	-0.403273	0.000329857	0.000389179	-1.40406
ENSG00000143355	LHX9	protein_coding	10442	1.04122	1.28748	0.0335013	0.108284	-0.306278	3.33132e-05	4.17376e-05	-1.37132
ENSG00000099377	HSD3B7	protein_coding	2490	1.08173	1.28742	0.0667153	0.144347	-0.251147	5.00074e-06	6.73914e-06	-1.33132
ENSG00000013275	PSMC4	protein_coding	2550	16.743	20.7106	2.57026	0.705481	-0.306813	4.75913e-05	5.91301e-05	-1.32619
ENSG00000152953	STK32B	protein_coding	5282	1.08333	1.28915	0.0596304	0.178312	-0.250948	5.47058e-06	7.33094e-06	-1.32048
ENSG00000128294	TPST2	protein_coding	6913	1.6368	2.07616	0.396152	0.405526	-0.343042	0.000143653	0.000173429	-1.3182
ENSG00000132669	RIN2	protein_coding	8273	1.6014	2.04678	0.397874	0.362435	-0.354022	0.000189817	0.000226415	-1.31755
ENSG00000185760	KCNQ5	protein_coding	7570	1.21403	1.46023	0.144098	0.272445	-0.266395	1.17968e-05	1.5377e-05	-1.31286
ENSG00000126005	MMP24OS	protein_coding	5520	1.33272	1.59079	0.220822	0.324712	-0.255373	7.58207e-06	1.00589e-05	-1.30756
ENSG00000170275	CRTAP	protein_coding	6660	3.23417	3.99255	1.05497	0.494717	-0.303918	5.03988e-05	6.24883e-05	-1.30611
ENSG00000145632	PLK2	protein_coding	4647	1.98556	2.65782	0.52397	0.529412	-0.420699	0.000800545	0.000919087	-1.30274
ENSG00000091409	ITGA6	protein_coding	6710	1.34724	1.80313	0.232183	0.333854	-0.420499	0.000805844	0.000924282	-1.30092
ENSG00000113583	C5orf15	protein_coding	2301	1.93531	2.63374	0.57466	0.40073	-0.444549	0.0012318	0.00140074	-1.2934
ENSG00000070882	OSBPL3	protein_coding	8089	1.29472	1.62115	0.211391	0.284791	-0.324377	0.000116242	0.000141481	-1.27631
ENSG00000031698	SARS1	protein_coding	3849	5.33149	6.4767	1.57985	0.44534	-0.280721	2.85703e-05	3.60221e-05	-1.27562
ENSG00000135631	RAB11FIP5	protein_coding	7058	1.11071	1.33315	0.087123	0.176365	-0.263354	1.47799e-05	1.89551e-05	-1.27208
ENSG00000068305	MEF2A	protein_coding	6925	1.34832	1.71607	0.245302	0.309201	-0.34794	0.000223553	0.00026533	-1.2702
ENSG00000124831	LRRFIP1	protein_coding	13218	2.21766	2.81587	0.694026	0.444101	-0.344548	0.000209341	0.000249454	-1.26764
ENSG00000099337	KCNK6	protein_coding	6168	1.103	1.34394	0.0781423	0.182617	-0.285034	4.23633e-05	5.27442e-05	-1.24646
ENSG00000116044	NFE2L2	protein_coding	5671	2.42682	3.05342	0.774987	0.464568	-0.331362	0.000175311	0.000209741	-1.24466
ENSG00000121691	CAT	protein_coding	3579	1.3329	1.72758	0.2468	0.272315	-0.374183	0.000505939	0.000589932	-1.23327
ENSG00000155090	KLF10	protein_coding	3821	2.31789	2.97172	0.712841	0.492543	-0.358485	0.000368365	0.000432902	-1.23094
ENSG00000162734	PEA15	protein_coding	2806	7.30198	8.74026	1.89688	0.442769	-0.259388	1.80424e-05	2.2942e-05	-1.23046
ENSG00000104332	SFRP1	protein_coding	4733	1.10494	1.38937	0.0806231	0.179951	-0.330466	0.000212517	0.000252987	-1.21367
ENSG00000135046	ANXA1	protein_coding	4453	17.3098	20.6822	2.77224	0.409592	-0.256796	2.03931e-05	2.58761e-05	-1.20451
ENSG00000134590	RTL8C	protein_coding	1192	6.8401	8.17562	1.79796	0.509768	-0.25731	2.16297e-05	2.73869e-05	-1.20034
ENSG00000133318	RTN3	protein_coding	5792	2.45332	3.11749	0.788422	0.469407	-0.345654	0.000345527	0.000407265	-1.19649
ENSG00000175416	CLTB	protein_coding	2039	2.01514	2.55563	0.54228	0.531035	-0.342798	0.000349975	0.000412101	-1.1847
ENSG00000109814	UGDH	protein_coding	4025	4.25548	5.8601	1.31155	0.530573	-0.461602	0.00285356	0.00315769	-1.1746
ENSG00000148634	HERC4	protein_coding	15847	2.08289	2.82166	0.620905	0.464478	-0.437956	0.00210665	0.00235079	-1.17215
ENSG00000111678	C12orf57	protein_coding	1806	1.62333	1.98567	0.408346	0.367976	-0.290665	9.28528e-05	0.00011336	-1.17202
ENSG00000100106	TRIOBP	protein_coding	12189	1.59108	1.97347	0.366319	0.402834	-0.310727	0.000174439	0.000208907	-1.16782
ENSG00000132507	EIF5A	protein_coding	2685	5.00146	7.02674	1.47947	0.522715	-0.490506	0.00419606	0.00459642	-1.16601
ENSG00000106105	GARS1	protein_coding	3995	5.77385	7.03066	1.6458	0.493833	-0.284127	8.24759e-05	0.000101209	-1.16028
ENSG00000150593	PDCD4	protein_coding	4547	1.47752	1.86666	0.306057	0.371793	-0.337286	0.000368097	0.000432902	-1.15825
ENSG00000131378	RFTN1	protein_coding	4769	1.55964	2.08791	0.368212	0.37461	-0.420843	0.00180258	0.00202663	-1.15484
ENSG00000189129	PLAC9	protein_coding	1240	1.79372	2.21115	0.487858	0.415313	-0.30184	0.000157332	0.000188988	-1.14795
ENSG00000138594	TMOD3	protein_coding	10632	1.77922	2.2714	0.499337	0.383799	-0.352338	0.000577177	0.000669727	-1.14112
ENSG00000100417	PMM1	protein_coding	5057	2.06084	2.57077	0.633642	0.418022	-0.318967	0.000300596	0.000355358	-1.12341
ENSG00000138085	ATRAID	protein_coding	2019	3.12324	3.76181	1.03897	0.443285	-0.268383	7.55852e-05	9.30399e-05	-1.10616
ENSG00000093167	LRRFIP2	protein_coding	10674	1.79806	2.15938	0.488331	0.4182	-0.264172	6.57079e-05	8.10488e-05	-1.10487
ENSG00000143774	GUK1	protein_coding	4725	5.71502	6.99695	1.63492	0.48341	-0.291968	0.000164609	0.000197531	-1.10468
ENSG00000176845	METRNL	protein_coding	2711	1.11334	1.32808	0.0838673	0.190293	-0.254454	4.61856e-05	5.74433e-05	-1.10318
ENSG00000138172	CALHM2	protein_coding	3108	1.63444	2.13968	0.423434	0.356981	-0.388596	0.00146709	0.00165881	-1.1011
ENSG00000204264	PSMB8	protein_coding	3480	1.6929	2.17167	0.442233	0.391545	-0.359311	0.00100066	0.00114224	-1.07783
ENSG00000137818	RPLP1	protein_coding	3252	11.1429	13.4651	2.33146	0.404012	-0.273109	0.000117555	0.000142934	-1.07325
ENSG00000125868	DSTN	protein_coding	3639	11.515	13.7867	2.28446	0.590631	-0.259762	8.37128e-05	0.000102621	-1.0591
ENSG00000277972	CISD3	protein_coding	3118	1.74401	2.18269	0.485098	0.364791	-0.323697	0.000550726	0.00064028	-1.05495
ENSG00000174282	ZBTB4	protein_coding	6132	1.14834	1.44481	0.117191	0.193308	-0.331323	0.000689333	0.000795999	-1.0475
ENSG00000185567	AHNAK2	protein_coding	18788	1.2604	1.64495	0.183929	0.28429	-0.384164	0.00188582	0.00211424	-1.04666
ENSG00000214253	FIS1	protein_coding	1791	3.66064	4.41013	1.1889	0.478187	-0.268726	0.000128964	0.000156486	-1.04522
ENSG00000198258	UBL5	protein_coding	1931	3.57237	4.46465	1.17456	0.450771	-0.321664	0.000589907	0.000683834	-1.03872
ENSG00000253368	TRNP1	protein_coding	1979	1.13807	1.49204	0.108787	0.187507	-0.390695	0.0022697	0.0025233	-1.03301
ENSG00000189171	S100A13	protein_coding	2216	2.90962	3.4973	0.966574	0.442203	-0.26541	0.000128585	0.000156186	-1.03266
ENSG00000144583	MARCHF4	protein_coding	4903	1.20224	1.45541	0.13229	0.278022	-0.275699	0.000187059	0.000223572	-1.02781
ENSG00000067715	SYT1	protein_coding	6389	1.06108	1.31929	0.0460045	0.146	-0.314228	0.000545095	0.000634351	-1.02549
ENSG00000204619	PPP1R11	protein_coding	2428	2.32814	2.90215	0.770672	0.38866	-0.317944	0.000679083	0.000784923	-1.00727
ENSG00000167123	CERCAM	protein_coding	6059	2.05526	2.74968	0.543213	0.555149	-0.419938	0.00400341	0.00439749	-1.00683
ENSG00000185630	PBX1	protein_coding	21249	1.12811	1.35651	0.0995823	0.187382	-0.265993	0.000165793	0.000198752	-1.00557
ENSG00000185070	FLRT2	protein_coding	34901	1.49084	1.87027	0.29403	0.400372	-0.327118	0.000846256	0.000969702	-1.00507
ENSG00000136235	GPNMB	protein_coding	6040	3.25869	4.17087	1.01496	0.57484	-0.356057	0.00158986	0.00179085	-0.996477
ENSG00000196776	CD47	protein_coding	8228	2.21531	3.10104	0.69405	0.442356	-0.485243	0.00893254	0.00960852	-0.994276
ENSG00000250742	LINC02381	lncRNA	4283	1.16161	1.3854	0.116797	0.230499	-0.254178	0.000130147	0.000157762	-0.987624
ENSG00000147872	PLIN2	protein_coding	5011	6.46704	8.17573	1.74503	0.492037	-0.33824	0.00125201	0.00142236	-0.981706
ENSG00000187134	AKR1C1	protein_coding	8765	1.247	1.49854	0.159987	0.300037	-0.2651	0.000213839	0.000254307	-0.972896
ENSG00000147509	RGS20	protein_coding	3205	1.19278	1.50168	0.146518	0.227214	-0.332253	0.00132863	0.00150654	-0.955758
ENSG00000136044	APPL2	protein_coding	5088	2.29152	2.85533	0.72987	0.442488	-0.317348	0.00104002	0.00118378	-0.946636
ENSG00000222041	CYTOR	lncRNA	17693	2.07766	2.61039	0.630639	0.434162	-0.329308	0.00133664	0.00151418	-0.946425
ENSG00000138119	MYOF	protein_coding	8490	3.70835	4.56013	1.15656	0.560025	-0.298296	0.000776375	0.000893055	-0.927678
ENSG00000125977	EIF2S2	protein_coding	2556	1.9371	2.31561	0.584849	0.38018	-0.257494	0.000275218	0.00032568	-0.916762
ENSG00000130724	CHMP2A	protein_coding	2110	2.53665	3.08129	0.838373	0.433996	-0.280613	0.000551285	0.000640306	-0.914413
ENSG00000108107	RPL28	protein_coding	6933	3.7318	4.4442	1.20093	0.483335	-0.252052	0.000250118	0.00029627	-0.907854
ENSG00000126709	IFI6	protein_coding	842	1.22664	1.48158	0.163004	0.257366	-0.272417	0.000472948	0.000553085	-0.905836
ENSG00000113369	ARRDC3	protein_coding	4985	1.63147	2.14448	0.382562	0.426635	-0.394453	0.0050721	0.00553573	-0.905196
ENSG00000116132	PRRX1	protein_coding	8248	3.9261	5.11287	1.20284	0.582951	-0.381037	0.00426535	0.00466803	-0.903076
ENSG00000100889	PCK2	protein_coding	4177	1.58753	2.1226	0.359856	0.412203	-0.419053	0.00727312	0.00788031	-0.896052
ENSG00000116761	CTH	protein_coding	2414	1.10992	1.34758	0.08473	0.181921	-0.279921	0.000631073	0.000730136	-0.895725
ENSG00000164038	SLC9B2	protein_coding	8611	1.41128	1.74973	0.281915	0.329324	-0.310131	0.00138708	0.00156983	-0.886323
ENSG00000119632	IFI27L2	protein_coding	1602	1.73466	2.11493	0.477618	0.362029	-0.28596	0.000796323	0.00091512	-0.886164
ENSG00000112208	BAG2	protein_coding	6651	2.06775	2.47607	0.615856	0.447521	-0.25999	0.000424498	0.000496913	-0.876719
ENSG00000104765	BNIP3L	protein_coding	4149	2.76392	3.35221	0.888362	0.501197	-0.278399	0.000766078	0.000882061	-0.867415
ENSG00000108861	DUSP3	protein_coding	4997	1.71477	2.09298	0.436257	0.422106	-0.28754	0.00100254	0.00114249	-0.862302
ENSG00000011198	ABHD5	protein_coding	7539	1.77371	2.34621	0.476639	0.419362	-0.403563	0.00734697	0.00795311	-0.861161
ENSG00000221852	KRTAP1-5	protein_coding	1183	1.42205	1.8189	0.246501	0.397902	-0.355093	0.00375794	0.00413928	-0.861119
ENSG00000166272	WBP1L	protein_coding	7833	1.3162	1.63503	0.213317	0.321785	-0.312935	0.00182474	0.00204768	-0.857066
ENSG00000154734	ADAMTS1	protein_coding	7055	1.92692	2.74046	0.499619	0.522914	-0.508118	0.0207888	0.0220051	-0.854741
ENSG00000197594	ENPP1	protein_coding	9959	1.41407	1.88969	0.267319	0.362884	-0.418293	0.009233	0.00991386	-0.851083
ENSG00000187446	CHP1	protein_coding	3947	2.48129	3.01754	0.806648	0.459918	-0.282281	0.00100279	0.00114249	-0.846502
ENSG00000163659	TIPARP	protein_coding	4800	1.99633	2.45655	0.570316	0.475815	-0.299287	0.00149528	0.00168908	-0.845569
ENSG00000008256	CYTH3	protein_coding	5808	1.2315	1.49257	0.142107	0.3004	-0.277378	0.000905667	0.00103579	-0.844071
ENSG00000013583	HEBP1	protein_coding	3428	1.32157	1.59804	0.240777	0.261774	-0.274044	0.000848566	0.000971417	-0.841675
ENSG00000135269	TES	protein_coding	4267	1.97996	2.48975	0.586717	0.432106	-0.33053	0.00314835	0.00348067	-0.826959
ENSG00000112308	C6orf62	protein_coding	2591	5.66285	6.74643	1.59879	0.540132	-0.252597	0.000544607	0.000634351	-0.824455
ENSG00000141741	MIEN1	protein_coding	2037	1.91095	2.29093	0.571977	0.375862	-0.261646	0.000740538	0.000854301	-0.819072
ENSG00000125821	DTD1	protein_coding	6465	1.43537	1.71811	0.310332	0.303738	-0.259398	0.000752468	0.000867227	-0.810233
ENSG00000183722	LHFPL6	protein_coding	4564	1.96482	2.40872	0.574739	0.436813	-0.293873	0.0019149	0.00214483	-0.798705
ENSG00000148700	ADD3	protein_coding	6539	1.83748	2.26793	0.505132	0.435373	-0.303651	0.00241545	0.00267785	-0.794654
ENSG00000168209	DDIT4	protein_coding	2054	1.11347	1.34481	0.0832636	0.189798	-0.27234	0.00126508	0.00143584	-0.789208
ENSG00000065911	MTHFD2	protein_coding	4822	2.78621	3.38141	0.862671	0.561993	-0.279318	0.00149961	0.00169238	-0.788801
ENSG00000213722	DDAH2	protein_coding	2363	1.78683	2.19371	0.461864	0.453804	-0.295966	0.00216282	0.00240897	-0.788744
ENSG00000188554	NBR1	protein_coding	8405	1.86555	2.41306	0.514651	0.448617	-0.371261	0.00759221	0.00819629	-0.786938
ENSG00000092820	EZR	protein_coding	3298	2.40821	3.00691	0.741882	0.517863	-0.320321	0.00380215	0.00418026	-0.775167
ENSG00000116586	LAMTOR2	protein_coding	1404	2.07938	2.53541	0.640368	0.420351	-0.286063	0.00199224	0.00222728	-0.772557
ENSG00000204852	TCTN1	protein_coding	9605	1.38358	1.6851	0.270257	0.313763	-0.284429	0.00226964	0.0025233	-0.752042
ENSG00000170035	UBE2E3	protein_coding	2974	2.1271	2.55739	0.659672	0.424284	-0.265789	0.00173557	0.00195313	-0.733725
ENSG00000174099	MSRB3	protein_coding	7405	2.56899	3.13987	0.833588	0.47572	-0.289504	0.00316004	0.00349036	-0.723849
ENSG00000038427	VCAN	protein_coding	14678	3.50449	4.68851	1.0972	0.560942	-0.419926	0.0192979	0.0204452	-0.719958
ENSG00000198715	GLMP	protein_coding	3471	2.1756	2.75823	0.653139	0.487832	-0.342326	0.00793847	0.00856236	-0.718974
ENSG00000122642	FKBP9	protein_coding	5169	1.5612	1.94382	0.393346	0.313799	-0.316242	0.00541219	0.00589612	-0.716802
ENSG00000070756	PABPC1	protein_coding	4147	6.38671	7.67134	1.77205	0.432781	-0.264405	0.00211994	0.00236341	-0.706934
ENSG00000141232	TOB1	protein_coding	2521	1.67161	2.05144	0.441402	0.367657	-0.295401	0.00417655	0.00457924	-0.702814
ENSG00000095321	CRAT	protein_coding	3808	1.45218	1.79964	0.295219	0.367298	-0.309488	0.00586888	0.0063762	-0.690605
ENSG00000182606	TRAK1	protein_coding	10799	1.4378	1.75169	0.294038	0.342634	-0.28489	0.0037686	0.0041472	-0.690522
ENSG00000198736	MSRB1	protein_coding	2157	1.71588	2.16887	0.454027	0.395155	-0.337998	0.00924893	0.00992203	-0.687457
ENSG00000163812	ZDHHC3	protein_coding	13405	1.84992	2.32547	0.49662	0.451918	-0.330062	0.00922319	0.00991223	-0.671715
ENSG00000109099	PMP22	protein_coding	3191	2.59853	3.10463	0.825947	0.503462	-0.256724	0.00256683	0.00284304	-0.66507
ENSG00000012822	CALCOCO1	protein_coding	8898	1.3309	1.58295	0.210553	0.347256	-0.25022	0.00231478	0.00257102	-0.659452
ENSG00000113083	LOX	protein_coding	5547	10.9542	13.1736	2.23657	0.576725	-0.266175	0.00336064	0.00370851	-0.658404
ENSG00000171055	FEZ2	protein_coding	8938	1.87723	2.35378	0.544341	0.39874	-0.326372	0.00969094	0.0103776	-0.657194
ENSG00000187079	TEAD1	protein_coding	10700	1.98991	2.45326	0.571607	0.462837	-0.301997	0.0066712	0.00723471	-0.657083
ENSG00000132376	INPP5K	protein_coding	5173	1.45762	1.78449	0.293824	0.375177	-0.291899	0.00565802	0.00615832	-0.655995
ENSG00000121060	TRIM25	protein_coding	9501	1.20014	1.46056	0.140506	0.257944	-0.283321	0.00514356	0.00560859	-0.648447
ENSG00000166619	BLCAP	protein_coding	7869	1.93491	2.42599	0.56414	0.429184	-0.326311	0.010309	0.0110196	-0.648311
ENSG00000119280	C1orf198	protein_coding	5161	1.52207	1.81926	0.341086	0.372639	-0.257313	0.00341436	0.00376431	-0.634712
ENSG00000124155	PIGT	protein_coding	19653	4.03859	4.84851	1.28811	0.483561	-0.26369	0.00411106	0.00451158	-0.629176
ENSG00000170876	TMEM43	protein_coding	3572	2.25422	2.7647	0.718637	0.430121	-0.294496	0.0075446	0.00815226	-0.625027
ENSG00000157514	TSC22D3	protein_coding	4766	1.42675	1.71913	0.277212	0.365068	-0.268944	0.00573468	0.00623607	-0.602835
ENSG00000164506	STXBP5	protein_coding	10504	1.25116	1.49875	0.17853	0.279356	-0.260495	0.00498924	0.00545027	-0.59965
ENSG00000180573	H2AC6	protein_coding	1668	1.15834	1.40675	0.115422	0.230932	-0.280305	0.00750371	0.00811543	-0.595571
ENSG00000116711	PLA2G4A	protein_coding	2879	1.20394	1.81047	0.15106	0.244769	-0.588604	0.0991296	0.1023	-0.590839
ENSG00000065308	TRAM2	protein_coding	7047	2.2434	2.74135	0.705266	0.452527	-0.289202	0.0114428	0.0122098	-0.561475
ENSG00000172175	MALT1	protein_coding	11448	1.14384	1.38683	0.114556	0.186825	-0.27791	0.00965374	0.010347	-0.560073
ENSG00000175602	CCDC85B	protein_coding	963	1.88722	2.91985	0.455017	0.547328	-0.629626	0.134287	0.138104	-0.549013
ENSG00000184838	PRR16	protein_coding	2252	1.32496	1.58425	0.225774	0.293583	-0.257852	0.00874586	0.00941619	-0.530709
ENSG00000250317	SMIM20	protein_coding	1612	1.65226	2.10485	0.422383	0.373986	-0.349274	0.0312375	0.0329484	-0.52577
ENSG00000171604	CXXC5	protein_coding	3795	1.71767	2.04344	0.409465	0.466672	-0.25055	0.00801526	0.00863738	-0.525173
ENSG00000138835	RGS3	protein_coding	13793	1.53216	1.83772	0.350864	0.361566	-0.262353	0.0101515	0.010861	-0.522993
ENSG00000022267	FHL1	protein_coding	5862	2.59194	3.12998	0.738833	0.595846	-0.272122	0.0128044	0.0136504	-0.51503
ENSG00000265972	TXNIP	protein_coding	3604	1.3461	1.62596	0.235038	0.330354	-0.272507	0.0131822	0.0140406	-0.512317
ENSG00000163931	TKT	protein_coding	9502	3.29595	3.9835	1.05848	0.523062	-0.273344	0.0136724	0.0145498	-0.509556
ENSG00000104427	ZC2HC1A	protein_coding	4139	2.09827	2.5537	0.604272	0.498411	-0.283388	0.016446	0.0174547	-0.505546
ENSG00000134853	PDGFRA	protein_coding	9547	2.25553	2.94207	0.673201	0.519839	-0.383365	0.0502154	0.0525479	-0.498054
ENSG00000149761	NUDT22	protein_coding	3721	1.36243	1.73596	0.260248	0.290314	-0.349554	0.0386833	0.0406941	-0.493737
ENSG00000153029	MR1	protein_coding	9348	1.09154	1.31388	0.0757282	0.146037	-0.267473	0.0149327	0.0158767	-0.488369
ENSG00000187840	EIF4EBP1	protein_coding	880	4.12845	5.04918	1.30202	0.485747	-0.290448	0.0225147	0.023811	-0.478523
ENSG00000055211	GINM1	protein_coding	2250	1.63797	1.97246	0.436476	0.334158	-0.268079	0.0191386	0.0202944	-0.460585
ENSG00000166311	SMPD1	protein_coding	2741	2.14653	2.59662	0.629493	0.497751	-0.274624	0.0225567	0.0238342	-0.45223
ENSG00000104047	DTWD1	protein_coding	14996	1.50595	2.21206	0.353366	0.317145	-0.554721	0.157348	0.161126	-0.445518
ENSG00000112773	TENT5A	protein_coding	6053	1.4955	1.84097	0.325834	0.368932	-0.299837	0.0362447	0.0381961	-0.431991
ENSG00000138685	FGF2	protein_coding	6775	1.54914	2.00018	0.357444	0.37892	-0.36866	0.0761141	0.0790263	-0.412359
ENSG00000185088	RPS27L	protein_coding	8825	5.26172	6.33206	1.53485	0.500433	-0.267139	0.0287173	0.0303169	-0.411889
ENSG00000173706	HEG1	protein_coding	9964	1.43822	1.76933	0.30183	0.332062	-0.29892	0.0435235	0.0457054	-0.406912
ENSG00000141574	SECTM1	protein_coding	2909	1.03711	1.2752	0.0274952	0.120163	-0.298151	0.0500759	0.0524479	-0.387707
ENSG00000162378	ZYG11B	protein_coding	8206	1.21759	1.47233	0.16467	0.23971	-0.274076	0.0393935	0.0414048	-0.384961
ENSG00000184349	EFNA5	protein_coding	5745	1.16637	1.42577	0.12063	0.235113	-0.289718	0.04703	0.0493443	-0.384637
ENSG00000004776	HSPB6	protein_coding	1724	2.79654	3.4642	0.840527	0.604939	-0.30888	0.0574254	0.0598829	-0.383288
ENSG00000072778	ACADVL	protein_coding	4820	2.65374	3.19642	0.700625	0.697224	-0.268429	0.0382795	0.0403049	-0.380374
ENSG00000180398	MCFD2	protein_coding	5942	5.45565	7.45593	1.50892	0.635586	-0.450639	0.152509	0.156306	-0.368039
ENSG00000114120	SLC25A36	protein_coding	10339	1.21914	1.49342	0.167143	0.234377	-0.292761	0.0617696	0.0641887	-0.354014
ENSG00000126368	NR1D1	protein_coding	2630	1.36295	1.65417	0.234257	0.350658	-0.279377	0.0592054	0.0616314	-0.342974
ENSG00000171862	PTEN	protein_coding	11069	1.54598	1.84999	0.367416	0.354203	-0.258997	0.0496608	0.0520589	-0.337728
ENSG00000114405	C3orf14	protein_coding	4430	1.80326	2.15314	0.489256	0.426364	-0.255836	0.0507849	0.0530974	-0.33112
ENSG00000112902	SEMA5A	protein_coding	12308	1.55334	1.86502	0.361469	0.373588	-0.263811	0.0562809	0.0587408	-0.329669
ENSG00000136542	GALNT5	protein_coding	10991	1.46076	1.75382	0.284257	0.3988	-0.263778	0.060047	0.0624531	-0.322207
ENSG00000167862	MRPL58	protein_coding	1108	2.08202	5.09211	0.599423	0.487194	-1.29028	0.568237	0.573037	-0.316725
ENSG00000171867	PRNP	protein_coding	2737	2.67574	3.18407	0.849101	0.5182	-0.250937	0.0556671	0.058151	-0.314776
ENSG00000143164	DCAF6	protein_coding	6306	1.99496	2.37478	0.590805	0.441906	-0.251432	0.0589648	0.0614345	-0.309112
ENSG00000103888	CEMIP	protein_coding	7621	1.50489	1.98571	0.281294	0.437717	-0.400002	0.172773	0.176771	-0.305011
ENSG00000159403	C1R	protein_coding	5803	1.23102	1.56507	0.158727	0.279697	-0.346367	0.136131	0.13976	-0.299969
ENSG00000111906	HDDC2	protein_coding	5888	2.1832	2.62521	0.656417	0.456708	-0.265988	0.0772906	0.0801781	-0.295745
ENSG00000060237	WNK1	protein_coding	14384	1.72953	2.08647	0.471255	0.379749	-0.270688	0.0860757	0.0892139	-0.288315
ENSG00000132471	WBP2	protein_coding	5399	1.58028	1.90073	0.384949	0.363742	-0.266372	0.0921481	0.0952596	-0.275832
ENSG00000150403	TMCO3	protein_coding	10381	1.78022	2.17188	0.478805	0.42216	-0.286887	0.109828	0.113243	-0.275207
ENSG00000163956	LRPAP1	protein_coding	11816	2.74121	3.27257	0.837776	0.570813	-0.255615	0.0863021	0.089371	-0.271969
ENSG00000048471	SNX29	protein_coding	11299	1.11616	1.33077	0.0891875	0.185182	-0.253716	0.0917902	0.0949718	-0.263155
ENSG00000169715	MT1E	protein_coding	1052	2.06409	2.46462	0.619879	0.442791	-0.255856	0.0975462	0.100753	-0.258617
ENSG00000145687	SSBP2	protein_coding	11284	1.64361	2.00838	0.40186	0.406711	-0.289167	0.136411	0.139927	-0.250173
ENSG00000189060	H1-0	protein_coding	2344	2.96788	3.61276	0.834098	0.658174	-0.283667	0.135048	0.138767	-0.246652
ENSG00000179833	SERTAD2	protein_coding	6274	2.27287	3.01469	0.684111	0.506436	-0.407493	0.249392	0.25429	-0.245766
ENSG00000138829	FBN2	protein_coding	13218	1.75764	2.10847	0.458377	0.435982	-0.262554	0.116182	0.11969	-0.245451
ENSG00000083799	CYLD	protein_coding	12954	1.45367	1.73835	0.311559	0.339469	-0.258016	0.127258	0.130988	-0.231006
ENSG00000111328	CDK2AP1	protein_coding	6027	2.33147	3.0879	0.73968	0.46395	-0.405384	0.297085	0.302662	-0.213686
ENSG00000136999	CCN3	protein_coding	2614	1.50842	1.90353	0.27083	0.44035	-0.335639	0.234273	0.239078	-0.211546
ENSG00000132386	SERPINF1	protein_coding	2990	1.6764	2.05022	0.414088	0.428046	-0.290411	0.187277	0.191446	-0.211279
ENSG00000105976	MET	protein_coding	7233	1.61474	1.94828	0.391584	0.401151	-0.270903	0.19306	0.197188	-0.193508
ENSG00000104490	NCALD	protein_coding	8043	1.2514	1.50334	0.181766	0.271916	-0.264623	0.328732	0.334617	-0.127855
ENSG00000173889	PHC3	protein_coding	16919	1.33134	1.58897	0.231385	0.307377	-0.255214	0.331063	0.336703	-0.122525
ENSG00000136928	GABBR2	protein_coding	7343	1.30528	1.55244	0.214748	0.301651	-0.250175	0.362719	0.368584	-0.110184
ENSG00000277998	AC107075.1	unprocessed_pseudogene	314	1.13471	1.42438	0.107724	0.181894	-0.328009	0.462006	0.468281	-0.109999
ENSG00000172667	ZMAT3	protein_coding	11298	1.43342	1.70756	0.289663	0.350379	-0.252468	0.371229	0.376911	-0.108652
ENSG00000154188	ANGPT1	protein_coding	7128	1.23885	1.52868	0.173058	0.265929	-0.303278	0.456197	0.462786	-0.103372
ENSG00000101255	TRIB3	protein_coding	3030	2.11169	2.6356	0.588597	0.534857	-0.319732	0.486411	0.492599	-0.100075
ENSG00000163453	IGFBP7	protein_coding	1930	5.88407	7.47565	1.41662	0.844707	-0.345386	0.513917	0.519574	-0.0998533
ENSG00000171150	SOCS5	protein_coding	7490	2.37987	2.91672	0.723018	0.521714	-0.293467	0.487579	0.493364	-0.0915486
ENSG00000134265	NAPG	protein_coding	5589	1.55931	1.90641	0.375215	0.361247	-0.289955	0.524487	0.529812	-0.0812642
ENSG00000132274	TRIM22	protein_coding	5944	1.37633	1.64662	0.249114	0.345573	-0.258683	0.530138	0.535067	-0.0712959
ENSG00000177410	ZFAS1	lncRNA	8315	1.54729	1.89848	0.373913	0.33815	-0.295103	0.580072	0.584478	-0.0697973
ENSG00000171345	KRT19	protein_coding	2336	1.98413	2.76248	0.505761	0.534814	-0.477457	0.751823	0.756257	-0.0591493
ENSG00000168575	SLC20A2	protein_coding	6424	2.66277	3.24194	0.793541	0.593157	-0.283931	0.711605	0.716405	-0.0419541
ENSG00000147475	ERLIN2	protein_coding	8736	4.02564	5.59608	0.996183	0.866443	-0.475199	0.829886	0.833376	-0.0384823
ENSG00000256537	SMIM10L1	protein_coding	4823	2.22988	3.58019	0.658821	0.501913	-0.683068	0.921664	0.922437	-0.0241992
ENSG00000245532	NEAT1	lncRNA	22767	2.51521	3.07858	0.646368	0.661363	-0.291588	0.827917	0.832098	-0.0239141
ENSG00000151012	SLC7A11	protein_coding	9645	1.6792	2.03629	0.391652	0.464786	-0.278175	0.837485	0.8403	-0.0214259
ENSG00000173230	GOLGB1	protein_coding	11865	1.81103	2.18486	0.487131	0.438278	-0.270726	0.858387	0.860549	-0.0179537
ENSG00000107798	LIPA	protein_coding	4891	2.58123	3.29208	0.749417	0.606457	-0.350941	0.896367	0.897871	-0.0166746
ENSG00000117155	SSX2IP	protein_coding	8639	1.34964	1.74756	0.232561	0.333198	-0.37277	0.949015	0.949015	-0.0084719
ENSG00000142871	CCN1	protein_coding	2443	12.9179	10.5941	2.23039	0.827633	0.286113	0.0113334	0.0121038	0.556673
ENSG00000105401	CDC37	protein_coding	3042	2.79628	2.24322	0.744033	0.708622	0.317941	0.0161299	0.0171344	0.569868
ENSG00000184840	TMED9	protein_coding	3513	7.0328	5.85523	1.76942	0.630933	0.264373	0.00193994	0.00217085	0.717035
ENSG00000164442	CITED2	protein_coding	2563	5.02655	4.18056	1.33556	0.738712	0.265871	0.00152117	0.00171509	0.749177
ENSG00000141959	PFKL	protein_coding	8926	2.14888	1.76798	0.575442	0.564982	0.281483	0.000989466	0.00113055	0.845744
ENSG00000105329	TGFB1	protein_coding	3249	2.30828	1.91817	0.594428	0.645896	0.267089	0.000624305	0.000723007	0.855913
ENSG00000176014	TUBB6	protein_coding	3941	12.2743	10.2502	2.339	0.613748	0.259985	0.000486801	0.000568728	0.861239
ENSG00000167658	EEF2	protein_coding	4021	7.29625	5.73875	1.6624	0.816564	0.346417	0.00232441	0.00257932	0.912353
ENSG00000008394	MGST1	protein_coding	7441	5.34595	4.46449	1.5339	0.54442	0.259949	0.000151767	0.000182487	0.992698
ENSG00000172380	GNG12	protein_coding	4715	7.50876	6.07874	1.79096	0.709272	0.304804	0.000495834	0.000578716	1.00727
ENSG00000137409	MTCH1	protein_coding	3126	5.1271	4.14539	1.4338	0.648826	0.306636	0.000398461	0.000467351	1.04244
ENSG00000165410	CFL2	protein_coding	4942	5.96669	4.98944	1.60513	0.625975	0.258053	8.99743e-05	0.000110071	1.04405
ENSG00000134871	COL4A2	protein_coding	19271	1.66098	1.37374	0.345778	0.473421	0.273924	0.000146938	0.000177217	1.04991
ENSG00000179091	CYC1	protein_coding	1963	3.27327	2.71715	1.02948	0.566595	0.268641	0.000105977	0.000129118	1.06779
ENSG00000167881	SRP68	protein_coding	7505	2.10252	1.7584	0.583648	0.517212	0.257856	6.41086e-05	7.91579e-05	1.08121
ENSG00000127463	EMC1	protein_coding	9602	2.05213	1.68168	0.524403	0.583583	0.287213	0.00013812	0.000167257	1.10857
ENSG00000074696	HACD3	protein_coding	7094	3.70604	3.10558	1.1783	0.519279	0.255017	3.87241e-05	4.83141e-05	1.12514
ENSG00000130402	ACTN4	protein_coding	6104	4.46427	3.33218	1.13779	0.827737	0.421958	0.00209149	0.00233605	1.13066
ENSG00000137309	HMGA1	protein_coding	2327	5.37765	4.02442	1.35467	0.814639	0.418198	0.00180775	0.00203053	1.14706
ENSG00000147955	SIGMAR1	protein_coding	2196	3.30918	2.74741	1.03708	0.566264	0.268404	4.77403e-05	5.92536e-05	1.1598
ENSG00000108106	UBE2S	protein_coding	2799	1.60888	1.34209	0.34582	0.459917	0.261576	3.49613e-05	4.37108e-05	1.16569
ENSG00000111711	GOLT1B	protein_coding	3789	2.93406	2.45161	0.879699	0.622486	0.259169	1.75828e-05	2.23815e-05	1.23232
ENSG00000009844	VTA1	protein_coding	7258	3.1068	2.59788	0.990775	0.544495	0.258095	1.60557e-05	2.04813e-05	1.23741
ENSG00000169100	SLC25A6	protein_coding	1553	9.02947	7.54833	2.08714	0.496461	0.258484	1.54133e-05	1.96829e-05	1.24385
ENSG00000100075	SLC25A1	protein_coding	1999	2.46495	2.06405	0.755308	0.508956	0.256076	1.29785e-05	1.68074e-05	1.25139
ENSG00000100412	ACO2	protein_coding	4049	2.38779	1.99633	0.71987	0.519562	0.258325	1.10994e-05	1.44838e-05	1.27992
ENSG00000149591	TAGLN	protein_coding	6550	13.5652	11.4041	2.50936	0.450235	0.250362	6.97644e-06	9.28636e-06	1.29096
ENSG00000128626	MRPS12	protein_coding	2144	2.44541	2.04619	0.783198	0.450453	0.257136	8.97598e-06	1.17902e-05	1.29775
ENSG00000145817	YIPF5	protein_coding	3698	4.40405	3.64822	1.33409	0.574347	0.271638	1.38546e-05	1.78451e-05	1.31973
ENSG00000178952	TUFM	protein_coding	2211	3.45187	2.87869	1.11521	0.507044	0.261963	8.38548e-06	1.10511e-05	1.32985
ENSG00000095906	NUBP2	protein_coding	4947	2.25741	1.89156	0.696624	0.476084	0.255093	5.12314e-06	6.89631e-06	1.34956
ENSG00000131473	ACLY	protein_coding	5208	4.85036	3.66372	1.2643	0.786674	0.404785	0.0004213	0.000493652	1.36631
ENSG00000214706	IFRD2	protein_coding	3712	2.64501	2.20827	0.839387	0.512813	0.260356	5.32851e-06	7.15663e-06	1.37296
ENSG00000141551	CSNK1D	protein_coding	11024	1.90114	1.58685	0.505941	0.468722	0.260703	5.17607e-06	6.95971e-06	1.37808
ENSG00000100528	CNIH1	protein_coding	5019	3.55614	2.91871	1.12362	0.553165	0.284982	1.32581e-05	1.71137e-05	1.39001
ENSG00000178035	IMPDH2	protein_coding	2773	3.37463	2.8363	1.11042	0.474009	0.250719	2.71969e-06	3.73255e-06	1.39537
ENSG00000099817	POLR2E	protein_coding	4870	4.14305	3.42155	1.30186	0.491153	0.276041	7.53608e-06	1.0009e-05	1.41412
ENSG00000105618	PRPF31	protein_coding	2673	2.17799	1.7937	0.632634	0.519154	0.280061	8.87956e-06	1.16764e-05	1.41476
ENSG00000136068	FLNB	protein_coding	13952	1.71314	1.39981	0.401482	0.476908	0.291413	1.3238e-05	1.71063e-05	1.42157
ENSG00000136108	CKAP2	protein_coding	4547	2.15955	1.80413	0.592886	0.554157	0.259431	3.25865e-06	4.44159e-06	1.42349
ENSG00000004897	CDC27	protein_coding	6824	2.32037	1.94907	0.727029	0.469206	0.251568	2.01791e-06	2.8016e-06	1.4327
ENSG00000135018	UBQLN1	protein_coding	6867	3.12744	2.61124	1.01748	0.516882	0.260247	2.63582e-06	3.62577e-06	1.45194
ENSG00000153187	HNRNPU	protein_coding	22512	2.9416	2.38565	0.916846	0.562785	0.302216	1.27289e-05	1.65199e-05	1.47941
ENSG00000106333	PCOLCE	protein_coding	3346	3.38933	2.83056	1.08353	0.535896	0.259913	2.00736e-06	2.79346e-06	1.48082
ENSG00000137547	MRPL15	protein_coding	1773	2.67606	2.24773	0.877854	0.463041	0.251641	1.0911e-06	1.56396e-06	1.50032
ENSG00000120742	SERP1	protein_coding	5743	3.94639	3.28103	1.25281	0.498597	0.266386	2.15935e-06	2.99102e-06	1.50926
ENSG00000130309	COLGALT1	protein_coding	4845	2.59546	2.10492	0.813946	0.509865	0.302225	8.48074e-06	1.11643e-05	1.53275
ENSG00000169139	UBE2V2	protein_coding	6591	2.56044	2.05219	0.75884	0.548801	0.319225	1.5036e-05	1.92216e-05	1.53958
ENSG00000114450	GNB4	protein_coding	6922	2.35951	1.95533	0.733738	0.493395	0.271075	1.81969e-06	2.54415e-06	1.55597
ENSG00000188229	TUBB4B	protein_coding	2037	8.3626	6.3672	1.89765	0.689254	0.393293	0.00010092	0.000123084	1.57161
ENSG00000113140	SPARC	protein_coding	4641	69.277	56.7047	4.13397	0.460593	0.288908	3.50336e-06	4.75883e-06	1.57614
ENSG00000163655	GMPS	protein_coding	8765	2.216	1.8632	0.688175	0.450408	0.250176	4.75651e-07	6.95137e-07	1.58179
ENSG00000169727	GPS1	protein_coding	6155	2.88019	2.38103	0.919419	0.531646	0.274583	1.6342e-06	2.29288e-06	1.58893
ENSG00000213024	NUP62	protein_coding	6020	2.41989	1.98858	0.708243	0.571662	0.283203	2.36483e-06	3.26428e-06	1.59335
ENSG00000049449	RCN1	protein_coding	4675	2.10316	1.76688	0.645213	0.4229	0.25136	4.54444e-07	6.67411e-07	1.59426
ENSG00000130147	SH3BP4	protein_coding	7085	1.77522	1.46218	0.451061	0.456406	0.279875	2.00695e-06	2.79346e-06	1.59458
ENSG00000166801	FAM111A	protein_coding	7221	1.97323	1.64305	0.560948	0.473315	0.264185	8.96152e-07	1.28916e-06	1.59769
ENSG00000079459	FDFT1	protein_coding	5197	3.42931	2.82201	1.09935	0.522105	0.281194	2.0356e-06	2.82289e-06	1.60036
ENSG00000136270	TBRG4	protein_coding	5803	1.97869	1.63435	0.558732	0.476356	0.275831	1.56785e-06	2.20757e-06	1.60111
ENSG00000112576	CCND3	protein_coding	5802	2.30277	1.88212	0.681744	0.527955	0.291009	3.0282e-06	4.13692e-06	1.60603
ENSG00000163636	PSMD6	protein_coding	9123	3.1347	2.56991	1.02319	0.497049	0.286609	2.35263e-06	3.25121e-06	1.61316
ENSG00000168906	MAT2A	protein_coding	4485	2.4422	1.9834	0.756663	0.512348	0.300206	4.01573e-06	5.4301e-06	1.61998
ENSG00000075618	FSCN1	protein_coding	3699	2.4077	1.87451	0.679582	0.594684	0.361144	3.21385e-05	4.03505e-05	1.62261
ENSG00000166963	MAP1A	protein_coding	10646	3.22081	2.5742	0.96793	0.638507	0.323298	9.57025e-06	1.2557e-05	1.62266
ENSG00000117410	ATP6V0B	protein_coding	3239	6.29877	5.14432	1.74234	0.44212	0.29209	2.75393e-06	3.7752e-06	1.62403
ENSG00000174695	TMEM167A	protein_coding	4865	2.80024	2.22306	0.865393	0.565208	0.333007	1.3198e-05	1.7073e-05	1.6249
ENSG00000089280	FUS	protein_coding	10283	2.75868	2.23249	0.753008	0.689153	0.30532	4.34795e-06	5.87268e-06	1.63704
ENSG00000107643	MAPK8	protein_coding	9674	1.67647	1.40779	0.393595	0.419191	0.251997	2.47551e-07	3.74147e-07	1.66478
ENSG00000170860	LSM3	protein_coding	3359	2.22837	1.81879	0.694833	0.452824	0.293014	2.01254e-06	2.79741e-06	1.66908
ENSG00000163359	COL6A3	protein_coding	19465	7.19753	5.85302	1.80606	0.60665	0.298322	2.33873e-06	3.23573e-06	1.67986
ENSG00000101811	CSTF2	protein_coding	2187	1.89206	1.56656	0.495443	0.489283	0.272356	6.14837e-07	8.95263e-07	1.69167
ENSG00000211459	MT-RNR1	Mt_rRNA	954	10.9665	8.28022	2.14325	0.736694	0.405363	6.63394e-05	8.17433e-05	1.6937
ENSG00000117751	PPP1R8	protein_coding	2815	2.00328	1.66801	0.595537	0.429577	0.264231	3.69867e-07	5.4928e-07	1.69952
ENSG00000196923	PDLIM7	protein_coding	4407	5.95434	4.77274	1.59871	0.640316	0.319124	4.61309e-06	6.22377e-06	1.70285
ENSG00000136522	MRPL47	protein_coding	1365	2.02222	1.69049	0.607359	0.434632	0.258493	2.32328e-07	3.52478e-07	1.71482
ENSG00000174231	PRPF8	protein_coding	11340	2.58597	2.12717	0.789293	0.553217	0.281774	8.06053e-07	1.16095e-06	1.71703
ENSG00000067225	PKM	protein_coding	8571	31.377	24.768	3.26129	0.66571	0.34123	8.33906e-06	1.10046e-05	1.73307
ENSG00000143742	SRP9	protein_coding	2220	3.16932	2.44516	0.943817	0.644288	0.374242	2.2947e-05	2.89934e-05	1.73621
ENSG00000185624	P4HB	protein_coding	5231	7.01773	5.35099	1.7131	0.728293	0.391198	3.23698e-05	4.05983e-05	1.75643
ENSG00000270647	TAF15	protein_coding	5883	1.90208	1.52186	0.463853	0.543722	0.321742	3.2988e-06	4.49119e-06	1.76368
ENSG00000108559	NUP88	protein_coding	6003	2.1283	1.77958	0.649405	0.452724	0.25816	1.45137e-07	2.22172e-07	1.76536
ENSG00000011304	PTBP1	protein_coding	6883	1.90225	1.57825	0.537565	0.433727	0.269378	2.75942e-07	4.16003e-07	1.7669
ENSG00000152795	HNRNPDL	protein_coding	5476	4.03338	3.33006	1.2792	0.504692	0.276443	3.76874e-07	5.58297e-07	1.77582
ENSG00000114686	MRPL3	protein_coding	2715	3.07424	2.55689	1.01563	0.463539	0.265839	2.02298e-07	3.08091e-07	1.77953
ENSG00000168827	GFM1	protein_coding	9032	1.94992	1.6346	0.55494	0.450747	0.254479	9.7903e-08	1.52011e-07	1.7837
ENSG00000157227	MMP14	protein_coding	4458	2.18215	1.6509	0.514853	0.657004	0.402495	3.50576e-05	4.37853e-05	1.79321
ENSG00000185963	BICD2	protein_coding	6448	1.46296	1.21238	0.282367	0.396347	0.271046	2.26501e-07	3.44074e-07	1.80108
ENSG00000124767	GLO1	protein_coding	2356	4.03698	3.22062	1.21752	0.603731	0.325937	2.63425e-06	3.62577e-06	1.81851
ENSG00000137168	PPIL1	protein_coding	1589	1.78118	1.48959	0.484904	0.41699	0.257915	7.47694e-08	1.17932e-07	1.83798
ENSG00000101773	RBBP8	protein_coding	5078	1.76678	1.48355	0.471866	0.41866	0.252068	3.64635e-08	5.93962e-08	1.87492
ENSG00000168785	TSPAN5	protein_coding	7412	1.73045	1.44331	0.445393	0.414721	0.261772	6.54435e-08	1.03909e-07	1.88061
ENSG00000128699	ORMDL1	protein_coding	4007	2.14672	1.7923	0.671997	0.42448	0.260318	5.62661e-08	9.00559e-08	1.88724
ENSG00000142156	COL6A1	protein_coding	5311	3.55058	2.69708	1.04118	0.643267	0.396654	1.69042e-05	2.15407e-05	1.89283
ENSG00000114019	AMOTL2	protein_coding	5984	2.0731	1.65395	0.575223	0.51971	0.325875	1.53075e-06	2.16043e-06	1.89499
ENSG00000165916	PSMC3	protein_coding	2276	4.07803	3.23358	1.24077	0.592083	0.334737	1.86488e-06	2.60125e-06	1.91782
ENSG00000174243	DDX23	protein_coding	5427	1.74194	1.46162	0.437382	0.453761	0.253121	2.46806e-08	4.09856e-08	1.92566
ENSG00000110367	DDX6	protein_coding	11462	2.47618	2.06868	0.810727	0.438323	0.259405	3.64267e-08	5.93962e-08	1.92961
ENSG00000205531	NAP1L4	protein_coding	5200	3.15988	2.55609	1.02895	0.488962	0.305931	4.81869e-07	7.03364e-07	1.93259
ENSG00000163110	PDLIM5	protein_coding	11090	3.96543	3.29008	1.25475	0.513498	0.269355	6.68292e-08	1.05968e-07	1.93263
ENSG00000114867	EIF4G1	protein_coding	8257	2.94931	2.34749	0.856502	0.647616	0.329256	1.25758e-06	1.79397e-06	1.94276
ENSG00000139793	MBNL2	protein_coding	4908	2.52696	1.9982	0.735809	0.590577	0.338704	1.8235e-06	2.54651e-06	1.94385
ENSG00000138434	ITPRID2	protein_coding	9685	1.8801	1.55014	0.5183	0.459893	0.278413	1.03367e-07	1.60078e-07	1.94488
ENSG00000086598	TMED2	protein_coding	3833	7.19671	5.95367	1.87616	0.477417	0.273559	7.6459e-08	1.20121e-07	1.9468
ENSG00000124193	SRSF6	protein_coding	4894	2.38135	1.89725	0.731676	0.497968	0.327874	1.13804e-06	1.62928e-06	1.94883
ENSG00000157456	CCNB2	protein_coding	2753	2.50244	2.06045	0.747829	0.561561	0.280375	1.08992e-07	1.68353e-07	1.95214
ENSG00000117308	GALE	protein_coding	3955	1.97045	1.62726	0.555936	0.454572	0.276086	7.88116e-08	1.23492e-07	1.96115
ENSG00000108179	PPIF	protein_coding	2671	2.27205	1.89402	0.7013	0.474567	0.262542	3.388e-08	5.53388e-08	1.96121
ENSG00000163479	SSR2	protein_coding	6643	6.71089	5.54444	1.81585	0.440143	0.275462	7.42899e-08	1.17331e-07	1.96379
ENSG00000100632	ERH	protein_coding	1113	3.87222	3.24866	1.27006	0.427333	0.253315	1.72237e-08	2.90057e-08	1.9667
ENSG00000167775	CD320	protein_coding	2279	3.65013	2.92774	1.11824	0.57718	0.31816	5.8014e-07	8.45772e-07	1.98419
ENSG00000170525	PFKFB3	protein_coding	6114	1.30215	1.09248	0.180813	0.35607	0.253291	1.31172e-08	2.25352e-08	1.99648
ENSG00000196924	FLNA	protein_coding	10642	6.91251	4.91245	1.52807	0.876737	0.492768	8.8351e-05	0.000108196	1.99758
ENSG00000014641	MDH1	polymorphic_pseudogene	4990	5.35695	4.37955	1.57244	0.490291	0.290628	1.30536e-07	2.00334e-07	2.00076
ENSG00000163811	WDR43	protein_coding	4103	2.15452	1.7778	0.66126	0.460066	0.277273	5.66105e-08	9.03649e-08	2.00942
ENSG00000041357	PSMA4	protein_coding	6994	4.17363	3.4232	1.32618	0.473579	0.285957	9.237e-08	1.43794e-07	2.01156
ENSG00000205542	TMSB4X	protein_coding	1703	24.9325	20.2848	3.11919	0.438348	0.297632	1.68774e-07	2.57364e-07	2.01577
ENSG00000138073	PREB	protein_coding	3212	2.06936	1.62711	0.5601	0.548642	0.346878	1.50152e-06	2.12418e-06	2.02003
ENSG00000125450	NUP85	protein_coding	5193	1.91152	1.59591	0.518996	0.451794	0.260343	1.52474e-08	2.59707e-08	2.03505
ENSG00000100664	EIF5	protein_coding	8318	4.60754	3.79035	1.42864	0.470418	0.281665	5.91782e-08	9.43375e-08	2.03583
ENSG00000082482	KCNK2	protein_coding	3910	2.17641	1.74665	0.635424	0.516013	0.317361	3.65365e-07	5.44626e-07	2.04294
ENSG00000038274	MAT2B	protein_coding	5135	2.64608	2.16756	0.867783	0.471987	0.287787	7.78636e-08	1.22167e-07	2.04578
ENSG00000112977	DAP	protein_coding	3361	4.80424	3.87194	1.44331	0.515982	0.311251	2.41871e-07	3.66025e-07	2.05937
ENSG00000106153	CHCHD2	protein_coding	1028	4.35629	3.61585	1.39444	0.410223	0.268767	2.17538e-08	3.63273e-08	2.05942
ENSG00000094916	CBX5	protein_coding	15038	3.07978	2.5317	0.999698	0.502411	0.282717	4.68224e-08	7.57258e-08	2.07219
ENSG00000135446	CDK4	protein_coding	3094	3.58684	2.94061	1.17206	0.476097	0.286599	4.46785e-08	7.23828e-08	2.10647
ENSG00000134809	TIMM10	protein_coding	776	3.56937	2.88855	1.15973	0.480507	0.305325	1.24137e-07	1.91005e-07	2.1086
ENSG00000101361	NOP56	protein_coding	4950	2.72075	2.22621	0.881391	0.47842	0.289415	5.09383e-08	8.1968e-08	2.11069
ENSG00000204463	BAG6	protein_coding	5310	2.07543	1.64707	0.545735	0.554069	0.333516	4.66529e-07	6.83479e-07	2.11153
ENSG00000197451	HNRNPAB	protein_coding	2118	2.30855	1.8315	0.685303	0.533918	0.333967	4.38267e-07	6.45242e-07	2.12345
ENSG00000069275	NUCKS1	protein_coding	6449	3.7857	3.18211	1.22812	0.452599	0.250578	3.32256e-09	6.17934e-09	2.12453
ENSG00000167657	DAPK3	protein_coding	3549	1.72479	1.42949	0.406199	0.484875	0.270928	1.39044e-08	2.37848e-08	2.12864
ENSG00000100567	PSMA3	protein_coding	3107	3.94548	3.1811	1.2568	0.497501	0.310676	1.34944e-07	2.06834e-07	2.13429
ENSG00000123416	TUBA1B	protein_coding	3574	4.96696	4.13068	1.52266	0.41888	0.265984	9.30704e-09	1.62703e-08	2.13616
ENSG00000087302	RTRAF	protein_coding	8287	3.04776	2.49381	1.01467	0.450359	0.289398	4.09942e-08	6.65947e-08	2.13786
ENSG00000227057	WDR46	protein_coding	2835	2.01992	1.66034	0.578197	0.476499	0.282813	2.4491e-08	4.07273e-08	2.15249
ENSG00000057608	GDI2	protein_coding	3918	5.7774	4.80738	1.67621	0.41521	0.265171	7.61974e-09	1.35588e-08	2.15268
ENSG00000070961	ATP2B1	protein_coding	9493	2.33828	1.94665	0.734275	0.473062	0.264457	6.61477e-09	1.19126e-08	2.16313
ENSG00000114346	ECT2	protein_coding	5499	1.93391	1.61169	0.539284	0.469976	0.262944	5.061e-09	9.19761e-09	2.18132
ENSG00000143149	ALDH9A1	protein_coding	3308	2.64788	2.14621	0.866501	0.462083	0.303045	5.48494e-08	8.79062e-08	2.20036
ENSG00000099800	TIMM13	protein_coding	1664	3.54716	2.86377	1.16403	0.447294	0.308749	7.3428e-08	1.16123e-07	2.20266
ENSG00000111247	RAD51AP1	protein_coding	2558	1.54361	1.28593	0.352445	0.386366	0.263497	4.27297e-09	7.84911e-09	2.20528
ENSG00000120437	ACAT2	protein_coding	2639	2.59215	2.14362	0.829391	0.492404	0.274104	8.55687e-09	1.50692e-08	2.21139
ENSG00000278259	MYO19	protein_coding	13075	1.71206	1.43856	0.439943	0.417238	0.251107	1.48465e-09	2.89652e-09	2.21686
ENSG00000160194	NDUFV3	protein_coding	6342	1.71298	1.43016	0.449343	0.38639	0.260335	2.82097e-09	5.30316e-09	2.22576
ENSG00000135316	SYNCRIP	protein_coding	8041	2.93315	2.37422	0.962779	0.48722	0.304997	4.95048e-08	7.98767e-08	2.22811
ENSG00000065135	GNAI3	protein_coding	9044	4.55255	3.6486	1.37588	0.55523	0.319331	1.01576e-07	1.57509e-07	2.23315
ENSG00000034152	MAP2K3	protein_coding	3775	2.66455	2.19565	0.853108	0.501657	0.279243	9.22383e-09	1.61722e-08	2.24374
ENSG00000079616	KIF22	protein_coding	4312	2.02951	1.66713	0.582886	0.481517	0.283761	1.20728e-08	2.08609e-08	2.24688
ENSG00000277443	MARCKS	protein_coding	4296	2.61264	2.102	0.828201	0.510372	0.313746	6.87527e-08	1.08874e-07	2.24727
ENSG00000162434	JAK1	protein_coding	12620	4.1726	3.34392	1.29479	0.549241	0.319408	9.11239e-08	1.42039e-07	2.24875
ENSG00000138778	CENPE	protein_coding	9928	1.56617	1.31266	0.339175	0.41891	0.254743	1.42522e-09	2.79427e-09	2.25349
ENSG00000130706	ADRM1	protein_coding	2142	2.64747	2.09087	0.82042	0.548913	0.340512	2.22195e-07	3.37963e-07	2.26552
ENSG00000108883	EFTUD2	protein_coding	10153	2.38501	1.96013	0.742954	0.498806	0.283044	9.39526e-09	1.64005e-08	2.27202
ENSG00000172172	MRPL13	protein_coding	4209	2.687	2.13935	0.865364	0.484051	0.328824	1.21001e-07	1.8642e-07	2.27454
ENSG00000152556	PFKM	protein_coding	7246	1.78114	1.46688	0.470082	0.440742	0.280045	6.79241e-09	1.22141e-08	2.2874
ENSG00000121073	SLC35B1	protein_coding	5898	2.82048	2.28065	0.923435	0.472132	0.306493	3.21344e-08	5.2704e-08	2.29656
ENSG00000108528	SLC25A11	protein_coding	2471	2.34244	1.9443	0.757028	0.423568	0.268762	2.59415e-09	4.90097e-09	2.30759
ENSG00000132600	PRMT7	protein_coding	9458	1.54618	1.26046	0.323209	0.420051	0.294756	1.46431e-08	2.4977e-08	2.30922
ENSG00000142657	PGD	protein_coding	3333	2.93522	2.35651	0.957539	0.4902	0.316817	4.68688e-08	7.57258e-08	2.32199
ENSG00000167552	TUBA1A	protein_coding	3178	15.3604	12.4913	2.64765	0.414328	0.298297	1.62158e-08	2.74633e-08	2.32375
ENSG00000064666	CNN2	protein_coding	3640	3.56655	2.8788	1.1501	0.494616	0.309064	2.55056e-08	4.22381e-08	2.34683
ENSG00000087087	SRRT	protein_coding	4858	1.57623	1.28668	0.341883	0.434249	0.29282	9.26134e-09	1.62141e-08	2.35232
ENSG00000148688	RPP30	protein_coding	4653	1.88568	1.57059	0.550948	0.399592	0.263783	1.20526e-09	2.38653e-09	2.35266
ENSG00000198830	HMGN2	protein_coding	3189	3.02742	2.49284	1.00583	0.454667	0.2803	3.90277e-09	7.21347e-09	2.35694
ENSG00000159840	ZYX	protein_coding	3267	5.49316	4.08166	1.43723	0.738551	0.42848	3.08295e-06	4.20691e-06	2.36137
ENSG00000256269	HMBS	protein_coding	4447	2.19003	1.83363	0.68651	0.436606	0.256247	5.48933e-10	1.13987e-09	2.37297
ENSG00000163938	GNL3	protein_coding	3238	2.58589	2.12067	0.849444	0.444476	0.286139	4.94503e-09	9.0143e-09	2.37662
ENSG00000077514	POLD3	protein_coding	5501	1.60218	1.32589	0.375381	0.415166	0.273076	1.94293e-09	3.69992e-09	2.37892
ENSG00000144136	SLC20A1	protein_coding	5493	5.24112	4.13794	1.45986	0.631842	0.340963	1.04183e-07	1.61133e-07	2.38067
ENSG00000125912	NCLN	protein_coding	4175	1.55593	1.25345	0.31756	0.438074	0.311877	2.31341e-08	3.85246e-08	2.38141
ENSG00000163002	NUP35	protein_coding	4025	1.56803	1.31514	0.360804	0.387784	0.25374	4.02764e-10	8.5266e-10	2.38387
ENSG00000007080	CCDC124	protein_coding	1661	1.9723	1.61666	0.578824	0.431489	0.286865	4.18906e-09	7.70684e-09	2.40332
ENSG00000110955	ATP5F1B	protein_coding	2238	19.1729	15.9285	2.905	0.320924	0.267456	9.62982e-10	1.92596e-09	2.41149
ENSG00000137831	UACA	protein_coding	10996	2.45855	1.9431	0.759548	0.522649	0.339449	7.62999e-08	1.20029e-07	2.41602
ENSG00000188486	H2AX	protein_coding	1614	1.54035	1.29241	0.353122	0.374787	0.25319	2.68825e-10	5.85724e-10	2.42317
ENSG00000110713	NUP98	protein_coding	9904	1.85209	1.51824	0.513359	0.435884	0.28675	3.51516e-09	6.52738e-09	2.4242
ENSG00000055044	NOP58	protein_coding	3274	2.65208	2.21473	0.879629	0.448688	0.259989	4.63058e-10	9.71689e-10	2.42683
ENSG00000137076	TLN1	protein_coding	9876	3.74559	2.86616	1.12934	0.621067	0.386073	4.68098e-07	6.84937e-07	2.44371
ENSG00000116962	NID1	protein_coding	5811	1.54268	1.29077	0.352681	0.378172	0.257207	3.07335e-10	6.64779e-10	2.44665
ENSG00000100401	RANGAP1	protein_coding	5348	2.27918	1.84446	0.681755	0.517824	0.305312	8.72517e-09	1.53257e-08	2.46058
ENSG00000145354	CISD2	protein_coding	6352	1.72228	1.43846	0.467686	0.374564	0.25979	3.25803e-10	6.99655e-10	2.46464
ENSG00000161980	POLR3K	protein_coding	1869	2.01253	1.61043	0.572272	0.464817	0.32156	2.01585e-08	3.37577e-08	2.47458
ENSG00000102978	POLR2C	protein_coding	3666	3.06433	2.50455	1.01675	0.452815	0.291016	2.82608e-09	5.30316e-09	2.48784
ENSG00000198612	COPS8	protein_coding	4181	4.05662	3.27717	1.28063	0.5136	0.307828	8.21214e-09	1.45264e-08	2.48896
ENSG00000196628	TCF4	protein_coding	28119	2.08295	1.66883	0.619231	0.47428	0.319786	1.64025e-08	2.77009e-08	2.48956
ENSG00000120802	TMPO	protein_coding	8593	2.1529	1.79062	0.644928	0.48783	0.26582	4.17757e-10	8.82836e-10	2.49315
ENSG00000167004	PDIA3	protein_coding	4221	6.67722	5.30089	1.78489	0.503559	0.333013	3.19555e-08	5.24826e-08	2.49608
ENSG00000101911	PRPS2	protein_coding	2758	1.63294	1.35074	0.404362	0.394602	0.273728	7.24082e-10	1.47033e-09	2.50193
ENSG00000132153	DHX30	protein_coding	7744	1.93631	1.55691	0.518368	0.503757	0.314629	8.72819e-09	1.53257e-08	2.53562
ENSG00000156515	HK1	protein_coding	6296	2.46608	1.96747	0.74352	0.547603	0.32588	1.6329e-08	2.7616e-08	2.53764
ENSG00000175166	PSMD2	protein_coding	4960	9.79661	7.45284	2.09343	0.65768	0.394492	3.65905e-07	5.44751e-07	2.5392
ENSG00000169813	HNRNPF	protein_coding	3253	5.51182	4.40879	1.59426	0.499783	0.322146	1.26482e-08	2.17921e-08	2.5443
ENSG00000214160	ALG3	protein_coding	3455	2.99059	2.3808	0.980179	0.472265	0.328981	1.81565e-08	3.04907e-08	2.54663
ENSG00000111665	CDCA3	protein_coding	5653	2.07597	1.69754	0.590636	0.50568	0.29034	1.57563e-09	3.05902e-09	2.55574
ENSG00000071282	LMCD1	protein_coding	9025	1.53983	1.24684	0.327131	0.421224	0.304493	3.6322e-09	6.73423e-09	2.56987
ENSG00000213551	DNAJC9	protein_coding	3218	2.03854	1.66878	0.617642	0.424347	0.288738	1.25582e-09	2.47842e-09	2.57008
ENSG00000120675	DNAJC15	protein_coding	8031	1.91775	1.55762	0.559244	0.411485	0.300072	2.60822e-09	4.91977e-09	2.57572
ENSG00000091140	DLD	protein_coding	5102	2.91506	2.31425	0.930024	0.521831	0.332986	1.80225e-08	3.03082e-08	2.5787
ENSG00000012061	ERCC1	protein_coding	5576	3.17345	2.50533	1.03523	0.483048	0.341053	2.69418e-08	4.45548e-08	2.58162
ENSG00000134375	TIMM17A	protein_coding	3504	4.58317	3.69172	1.40143	0.521123	0.312052	4.65364e-09	8.49609e-09	2.60008
ENSG00000133657	ATP13A3	protein_coding	13254	2.19993	1.75016	0.638271	0.516295	0.329968	1.29912e-08	2.23509e-08	2.60224
ENSG00000138796	HADH	protein_coding	12086	1.82966	1.51722	0.516448	0.40608	0.27015	2.23046e-10	4.91359e-10	2.60738
ENSG00000159259	CHAF1B	protein_coding	5104	1.69666	1.39513	0.419009	0.423864	0.282295	5.17287e-10	1.07979e-09	2.62147
ENSG00000127616	SMARCA4	protein_coding	15778	1.83332	1.46448	0.476774	0.475059	0.324065	7.72581e-09	1.37271e-08	2.62884
ENSG00000102024	PLS3	protein_coding	4099	8.5095	6.969	2.02553	0.512023	0.288123	7.20363e-10	1.46527e-09	2.63415
ENSG00000136718	IMP4	protein_coding	3366	2.51712	2.00084	0.809934	0.472648	0.331164	1.08548e-08	1.88107e-08	2.63752
ENSG00000184232	OAF	protein_coding	2913	1.80693	1.46823	0.471102	0.450028	0.299467	1.38376e-09	2.71746e-09	2.65296
ENSG00000073111	MCM2	protein_coding	4715	1.52562	1.24687	0.3065	0.433348	0.29108	6.74502e-10	1.3814e-09	2.6695
ENSG00000119408	NEK6	protein_coding	4419	2.08199	1.67135	0.620803	0.450281	0.316948	3.77429e-09	6.98683e-09	2.6697
ENSG00000198700	IPO9	protein_coding	11904	2.19912	1.75079	0.661016	0.492236	0.328921	7.29826e-09	1.30642e-08	2.67635
ENSG00000100216	TOMM22	protein_coding	2182	3.22519	2.64211	1.09597	0.387701	0.287692	4.84639e-10	1.01519e-09	2.67973
ENSG00000167005	NUDT21	protein_coding	5930	2.82469	2.31514	0.92704	0.48327	0.286993	3.93981e-10	8.37034e-10	2.69903
ENSG00000109674	NEIL3	protein_coding	2914	1.57177	1.30866	0.361161	0.402363	0.264292	5.94646e-11	1.41155e-10	2.70258
ENSG00000125445	MRPS7	protein_coding	3327	2.49086	2.00454	0.819371	0.415761	0.313378	2.32451e-09	4.40444e-09	2.7056
ENSG00000204392	LSM2	protein_coding	1059	2.01656	1.64354	0.608259	0.41474	0.295084	6.69844e-10	1.37422e-09	2.70711
ENSG00000101134	DOK5	protein_coding	2606	2.01312	1.64894	0.603945	0.429774	0.287891	3.57209e-10	7.61622e-10	2.71973
ENSG00000109606	DHX15	protein_coding	8166	3.16446	2.57767	1.03348	0.508008	0.295896	6.32868e-10	1.30509e-09	2.72186
ENSG00000117394	SLC2A1	protein_coding	4416	1.80332	1.41408	0.46002	0.478311	0.350792	1.69349e-08	2.85597e-08	2.72608
ENSG00000113758	DBN1	protein_coding	5119	2.5142	1.82114	0.658539	0.666815	0.465261	1.37399e-06	1.95303e-06	2.72737
ENSG00000198900	TOP1	protein_coding	3734	1.46658	1.22321	0.284487	0.35381	0.261791	3.74273e-11	9.13868e-11	2.72965
ENSG00000115541	HSPE1	protein_coding	1823	1.60241	1.3268	0.405931	0.353225	0.272298	9.00653e-11	2.08812e-10	2.73535
ENSG00000163661	PTX3	protein_coding	1884	4.35005	2.86252	0.937878	0.922173	0.603747	2.88528e-05	3.634e-05	2.7409
ENSG00000127955	GNAI1	protein_coding	24192	1.78986	1.47547	0.492979	0.407095	0.278675	1.30986e-10	2.9677e-10	2.75408
ENSG00000116750	UCHL5	protein_coding	6661	2.03728	1.68705	0.61059	0.439223	0.272147	7.36808e-11	1.725e-10	2.75757
ENSG00000173456	RNF26	protein_coding	2783	2.34231	1.74517	0.652092	0.605103	0.424565	2.82947e-07	4.2549e-07	2.78018
ENSG00000063244	U2AF2	protein_coding	4115	1.45578	1.20649	0.294603	0.366659	0.270976	5.3229e-11	1.26857e-10	2.78397
ENSG00000136699	SMPD4	protein_coding	7375	1.67296	1.33271	0.399416	0.443041	0.328043	3.11441e-09	5.81033e-09	2.79054
ENSG00000070785	EIF2B3	protein_coding	3411	2.27965	1.7943	0.698482	0.473457	0.345392	8.01845e-09	1.42048e-08	2.79626
ENSG00000092607	TBX15	protein_coding	4344	1.75555	1.45469	0.458526	0.422765	0.271213	4.55385e-11	1.09183e-10	2.80478
ENSG00000183527	PSMG1	protein_coding	2152	2.47869	2.01818	0.817829	0.435414	0.296525	3.44823e-10	7.36526e-10	2.80584
ENSG00000132646	PCNA	protein_coding	1403	4.11425	3.21731	1.25313	0.589984	0.354774	1.22749e-08	2.11795e-08	2.80661
ENSG00000215012	RTL10	protein_coding	6803	1.55072	1.26895	0.340547	0.406523	0.289301	1.95827e-10	4.32995e-10	2.80857
ENSG00000169679	BUB1	protein_coding	6304	1.93138	1.59547	0.517264	0.50243	0.275651	6.30478e-11	1.48773e-10	2.81174
ENSG00000189043	NDUFA4	protein_coding	3461	4.56011	3.6075	1.40173	0.507605	0.33807	4.52358e-09	8.28398e-09	2.82103
ENSG00000101367	MAPRE1	protein_coding	2562	4.40872	3.50687	1.35211	0.525753	0.330175	2.82924e-09	5.30316e-09	2.82244
ENSG00000163017	ACTG2	protein_coding	3811	1.30938	1.02894	0.136959	0.367595	0.347723	7.43775e-09	1.32746e-08	2.82649
ENSG00000177606	JUN	protein_coding	3257	1.54436	1.17217	0.286425	0.465198	0.397829	7.61507e-08	1.19952e-07	2.83188
ENSG00000108344	PSMD3	protein_coding	4953	2.60793	1.92074	0.729213	0.653797	0.441245	3.69272e-07	5.49079e-07	2.83838
ENSG00000104064	GABPB1	protein_coding	5677	1.71523	1.41278	0.454253	0.398055	0.279869	6.71788e-11	1.57897e-10	2.84704
ENSG00000099797	TECR	protein_coding	5899	1.89939	1.55264	0.542348	0.417131	0.290809	1.6153e-10	3.639e-10	2.84753
ENSG00000067057	PFKP	protein_coding	5554	3.76725	2.8622	1.1088	0.657089	0.396386	5.64165e-08	9.01757e-08	2.87324
ENSG00000133103	COG6	protein_coding	8047	2.22753	1.71559	0.656943	0.516054	0.376743	2.09277e-08	3.49968e-08	2.89311
ENSG00000023330	ALAS1	protein_coding	2536	1.96027	1.59549	0.580792	0.421045	0.297048	1.80428e-10	4.01924e-10	2.89434
ENSG00000276600	RAB7B	protein_coding	3686	1.34717	1.1328	0.227111	0.34117	0.250039	2.6043e-12	7.64012e-12	2.89653
ENSG00000106628	POLD2	protein_coding	3695	3.50105	2.70949	1.1208	0.512514	0.369765	1.41294e-08	2.41352e-08	2.90261
ENSG00000184640	SEPTIN9	protein_coding	12817	1.75116	1.40489	0.439249	0.447187	0.317859	7.37017e-10	1.49405e-09	2.90285
ENSG00000104824	HNRNPL	protein_coding	6821	1.40374	1.16494	0.27062	0.338862	0.269022	1.58685e-11	4.03986e-11	2.90529
ENSG00000122406	RPL5	protein_coding	3687	8.24401	6.60222	2.03048	0.417864	0.320396	8.08773e-10	1.63121e-09	2.9131
ENSG00000177469	CAVIN1	protein_coding	3570	6.63302	4.83258	1.70581	0.617523	0.456871	4.19542e-07	6.19201e-07	2.91357
ENSG00000130816	DNMT1	protein_coding	9796	2.12206	1.73198	0.641306	0.462454	0.29304	1.07419e-10	2.46176e-10	2.9213
ENSG00000136527	TRA2B	protein_coding	13084	4.72757	3.73667	1.44076	0.489758	0.339346	2.32764e-09	4.40444e-09	2.9296
ENSG00000163161	ERCC3	protein_coding	8412	1.6809	1.39163	0.441566	0.380564	0.272458	1.59657e-11	4.05596e-11	2.94168
ENSG00000064703	DDX20	protein_coding	5585	1.37812	1.1478	0.253552	0.33243	0.263828	6.78299e-12	1.84066e-11	2.94659
ENSG00000123737	EXOSC9	protein_coding	4711	2.29316	1.83497	0.720666	0.461282	0.32158	6.87055e-10	1.4047e-09	2.94664
ENSG00000101407	TTI1	protein_coding	4472	1.48675	1.23952	0.294254	0.394105	0.262382	5.18871e-12	1.43079e-11	2.96097
ENSG00000135624	CCT7	protein_coding	3591	7.7971	6.23854	1.95918	0.450948	0.321729	6.1889e-10	1.28068e-09	2.96261
ENSG00000187498	COL4A1	protein_coding	14662	1.76106	1.36123	0.432991	0.476381	0.371526	1.04144e-08	1.81265e-08	2.96565
ENSG00000064102	INTS13	protein_coding	3059	1.64788	1.33134	0.411708	0.396634	0.307735	2.27491e-10	5.00229e-10	2.9675
ENSG00000173473	SMARCC1	protein_coding	7624	1.75692	1.44352	0.460713	0.423402	0.283462	3.19561e-11	7.83483e-11	2.97506
ENSG00000130826	DKC1	protein_coding	4203	2.40432	1.90019	0.746677	0.493679	0.339489	1.63403e-09	3.15701e-09	2.983
ENSG00000100911	PSME2	protein_coding	3582	3.20044	2.55222	1.0658	0.440014	0.326516	7.17219e-10	1.46136e-09	2.98577
ENSG00000152492	CCDC50	protein_coding	9183	1.89309	1.51343	0.546954	0.416386	0.322916	5.31405e-10	1.1054e-09	2.99491
ENSG00000179950	PUF60	protein_coding	4917	5.27361	3.90358	1.45652	0.663822	0.433995	1.20381e-07	1.85704e-07	3.003
ENSG00000142230	SAE1	protein_coding	3742	4.11857	3.26165	1.31951	0.45505	0.336543	1.16796e-09	2.32037e-09	3.00619
ENSG00000103194	USP10	protein_coding	5083	2.26043	1.83313	0.704086	0.458074	0.302284	1.08056e-10	2.4669e-10	3.01267
ENSG00000148175	STOM	protein_coding	3199	2.94449	2.26108	0.93416	0.539166	0.381007	1.14526e-08	1.98179e-08	3.02561
ENSG00000166900	STX3	protein_coding	7308	1.47864	1.23636	0.313945	0.356111	0.25817	1.75407e-12	5.41178e-12	3.03503
ENSG00000116157	GPX7	protein_coding	1692	2.07504	1.64013	0.625628	0.443121	0.339325	1.12862e-09	2.24596e-09	3.03609
ENSG00000164134	NAA15	protein_coding	9664	2.09096	1.6388	0.601236	0.47985	0.35153	2.1627e-09	4.10534e-09	3.04601
ENSG00000147416	ATP6V1B2	protein_coding	7797	3.19973	2.54928	1.03894	0.510445	0.327862	4.94489e-10	1.03401e-09	3.05103
ENSG00000023734	STRAP	protein_coding	2215	5.19194	4.01043	1.52464	0.520585	0.372515	5.87834e-09	1.06345e-08	3.06607
ENSG00000044574	HSPA5	protein_coding	3921	17.8847	14.0378	2.64544	0.7206	0.349408	1.62744e-09	3.14937e-09	3.07077
ENSG00000198015	MRPL42	protein_coding	16394	2.41373	1.89448	0.764791	0.48131	0.349461	1.43325e-09	2.80542e-09	3.09052
ENSG00000174780	SRP72	protein_coding	6145	4.27042	3.38513	1.35667	0.456779	0.335165	5.79991e-10	1.20227e-09	3.09578
ENSG00000174437	ATP2A2	protein_coding	13745	2.38886	1.89026	0.742487	0.501804	0.337736	6.67313e-10	1.37138e-09	3.09896
ENSG00000184164	CRELD2	protein_coding	5165	2.49465	1.9151	0.74338	0.571392	0.381419	7.30894e-09	1.30642e-08	3.10328
ENSG00000156802	ATAD2	protein_coding	7100	1.97116	1.60274	0.557919	0.467678	0.298509	3.81085e-11	9.26713e-11	3.11015
ENSG00000115875	SRSF7	protein_coding	4045	4.11624	3.21573	1.30453	0.490811	0.356181	1.71997e-09	3.30168e-09	3.12174
ENSG00000013810	TACC3	protein_coding	8202	1.68373	1.34904	0.395481	0.467574	0.319725	1.62658e-10	3.65064e-10	3.1297
ENSG00000188529	SRSF10	protein_coding	11860	3.35433	2.64397	1.0765	0.544329	0.343317	7.64499e-10	1.54452e-09	3.12989
ENSG00000136518	ACTL6A	protein_coding	3668	2.756	2.19808	0.916801	0.448119	0.326329	2.53008e-10	5.54297e-10	3.13174
ENSG00000115648	MLPH	protein_coding	7435	1.4708	1.23522	0.31718	0.350787	0.251839	3.43383e-13	1.16301e-12	3.13897
ENSG00000011422	PLAUR	protein_coding	4457	6.47286	4.98523	1.73352	0.553815	0.376744	4.60016e-09	8.41132e-09	3.141
ENSG00000111252	SH2B3	protein_coding	5707	1.51261	1.2452	0.336741	0.369505	0.280668	6.37515e-12	1.73392e-11	3.14222
ENSG00000169756	LIMS1	protein_coding	7771	2.32736	1.8503	0.735583	0.452476	0.330938	3.10507e-10	6.69214e-10	3.14654
ENSG00000137812	KNL1	protein_coding	10250	1.57005	1.27042	0.342519	0.426832	0.305498	4.86231e-11	1.16112e-10	3.15065
ENSG00000024526	DEPDC1	protein_coding	5904	1.4384	1.20235	0.290603	0.356176	0.258604	6.23866e-13	2.02417e-12	3.15624
ENSG00000165490	DDIAS	protein_coding	5339	1.43954	1.20314	0.292607	0.350581	0.258804	5.57723e-13	1.81946e-12	3.17128
ENSG00000060688	SNRNP40	protein_coding	3887	2.45812	1.97532	0.800769	0.433123	0.315469	8.56822e-11	1.99424e-10	3.17586
ENSG00000189091	SF3B3	protein_coding	12416	2.63815	2.04013	0.817627	0.546268	0.370865	2.71237e-09	5.10815e-09	3.17707
ENSG00000006576	PHTF2	protein_coding	8646	2.0641	1.61925	0.585541	0.508871	0.350184	8.22074e-10	1.65102e-09	3.18145
ENSG00000221829	FANCG	protein_coding	3614	1.65343	1.31984	0.371422	0.468404	0.325093	1.5563e-10	3.5127e-10	3.18848
ENSG00000205581	HMGN1	protein_coding	5042	2.42331	1.97755	0.809667	0.391811	0.293267	1.32988e-11	3.42215e-11	3.18962
ENSG00000112759	SLC29A1	protein_coding	4298	1.70619	1.39741	0.425729	0.430514	0.288023	7.48888e-12	2.00487e-11	3.20443
ENSG00000138758	SEPTIN11	protein_coding	9787	8.413	6.74356	2.05661	0.387819	0.319109	8.71978e-11	2.02557e-10	3.21007
ENSG00000196419	XRCC6	protein_coding	3288	4.74041	3.68285	1.45303	0.468983	0.364188	1.52548e-09	2.96649e-09	3.2109
ENSG00000101365	IDH3B	protein_coding	2567	2.45712	1.93384	0.783385	0.463564	0.345503	4.6161e-10	9.70356e-10	3.22552
ENSG00000102359	SRPX2	protein_coding	7519	1.53865	1.27482	0.362645	0.356242	0.271368	1.29434e-12	4.02631e-12	3.22601
ENSG00000136875	PRPF4	protein_coding	3613	2.18302	1.68994	0.643415	0.499508	0.369356	1.84315e-09	3.52116e-09	3.22612
ENSG00000166128	RAB8B	protein_coding	5103	1.60449	1.2742	0.370157	0.420827	0.332523	1.7135e-10	3.83131e-10	3.24746
ENSG00000172115	CYCS	protein_coding	5791	2.82153	2.23859	0.916425	0.50197	0.33389	1.81284e-10	4.03078e-10	3.25264
ENSG00000134222	PSRC1	protein_coding	2855	1.50022	1.25648	0.316287	0.383951	0.255788	1.79049e-13	6.38163e-13	3.26053
ENSG00000092853	CLSPN	protein_coding	9591	1.90645	1.54108	0.540673	0.442942	0.30695	2.37892e-11	5.91757e-11	3.26092
ENSG00000101003	GINS1	protein_coding	4130	1.72427	1.40191	0.43324	0.442088	0.298588	1.1969e-11	3.11349e-11	3.26116
ENSG00000105486	LIG1	protein_coding	6576	1.47912	1.21554	0.290963	0.406164	0.28315	2.83891e-12	8.24735e-12	3.26948
ENSG00000183431	SF3A3	protein_coding	3894	3.32689	2.62664	1.10388	0.448702	0.340956	2.35714e-10	5.17357e-10	3.28259
ENSG00000116120	FARSB	protein_coding	6761	2.82671	2.23265	0.93164	0.471653	0.340368	1.62553e-10	3.65064e-10	3.33186
ENSG00000071127	WDR1	protein_coding	7827	7.58625	5.59646	1.82355	0.687636	0.438872	2.50358e-08	4.15178e-08	3.33606
ENSG00000138074	SLC5A6	protein_coding	5588	1.5049	1.25148	0.311399	0.402401	0.266027	2.50681e-13	8.70097e-13	3.35217
ENSG00000129195	PIMREG	protein_coding	2797	1.93342	1.56755	0.530895	0.485412	0.302648	8.24521e-12	2.20241e-11	3.35449
ENSG00000168393	DTYMK	protein_coding	2399	3.01944	2.36233	0.985334	0.483359	0.354076	3.27992e-10	7.03091e-10	3.3581
ENSG00000197157	SND1	protein_coding	6486	3.97872	2.87576	1.14001	0.702394	0.468364	6.35036e-08	1.01098e-07	3.37091
ENSG00000156471	PTDSS1	protein_coding	6108	2.38284	1.84824	0.747704	0.49053	0.366533	6.24408e-10	1.28987e-09	3.37377
ENSG00000130066	SAT1	protein_coding	2498	2.42797	1.91187	0.76871	0.478811	0.344771	1.63493e-10	3.66248e-10	3.37411
ENSG00000180198	RCC1	protein_coding	3888	2.06882	1.61104	0.571332	0.53385	0.360813	4.23871e-10	8.94173e-10	3.38181
ENSG00000111206	FOXM1	protein_coding	4899	1.5422	1.25676	0.346891	0.392032	0.295279	3.36573e-12	9.54556e-12	3.38771
ENSG00000135905	DOCK10	protein_coding	11265	1.63389	1.37376	0.389456	0.419788	0.250179	2.36183e-14	9.18575e-14	3.40913
ENSG00000100345	MYH9	protein_coding	9012	3.53039	2.51851	1.04373	0.636534	0.487255	8.8019e-08	1.37559e-07	3.43779
ENSG00000163918	RFC4	protein_coding	2997	1.84356	1.49781	0.503411	0.423719	0.299634	2.45243e-12	7.26601e-12	3.47887
ENSG00000147224	PRPS1	protein_coding	2623	4.05598	3.11372	1.25669	0.531739	0.381409	7.52921e-10	1.52371e-09	3.47969
ENSG00000141030	COPS3	protein_coding	2972	3.16515	2.48385	1.04963	0.46771	0.349693	1.02869e-10	2.37574e-10	3.49264
ENSG00000117724	CENPF	protein_coding	11673	2.39396	1.90534	0.695941	0.569361	0.329352	2.43284e-11	6.0391e-11	3.49571
ENSG00000072501	SMC1A	protein_coding	10484	2.02428	1.61157	0.574626	0.491672	0.32894	2.23024e-11	5.59433e-11	3.50375
ENSG00000008513	ST3GAL1	protein_coding	8852	1.87666	1.53025	0.52189	0.443785	0.294401	1.21043e-12	3.78338e-12	3.50839
ENSG00000196290	NIF3L1	protein_coding	1993	1.93945	1.54278	0.55642	0.439063	0.330114	2.28914e-11	5.71807e-11	3.51252
ENSG00000166923	GREM1	protein_coding	14784	19.8634	14.2631	2.74416	0.733358	0.477829	4.38633e-08	7.11587e-08	3.51582
ENSG00000188976	NOC2L	protein_coding	5540	1.82771	1.38589	0.433309	0.532646	0.399222	1.44498e-09	2.82373e-09	3.52918
ENSG00000182944	EWSR1	protein_coding	10326	4.85386	3.68895	1.4277	0.571687	0.395923	1.21607e-09	2.40395e-09	3.52967
ENSG00000039560	RAI14	protein_coding	7581	3.4665	2.68121	1.10259	0.542123	0.370594	2.97007e-10	6.43606e-10	3.53073
ENSG00000197646	PDCD1LG2	protein_coding	2432	2.28711	1.77567	0.675686	0.540271	0.36516	2.07186e-10	4.57265e-10	3.53608
ENSG00000141076	UTP4	protein_coding	5600	3.07294	2.41434	1.01243	0.48215	0.347994	6.89415e-11	1.61721e-10	3.53615
ENSG00000148908	RGS10	protein_coding	1274	1.4976	1.25401	0.334852	0.346646	0.256102	1.41739e-14	5.73681e-14	3.54664
ENSG00000133313	CNDP2	protein_coding	11822	2.58297	2.03584	0.809382	0.526035	0.343407	4.43412e-11	1.06526e-10	3.55536
ENSG00000099901	RANBP1	protein_coding	4620	2.80037	2.20759	0.92974	0.440886	0.343148	4.23589e-11	1.02175e-10	3.55949
ENSG00000138363	ATIC	protein_coding	3789	2.8296	2.1842	0.916008	0.492845	0.373494	2.94458e-10	6.39242e-10	3.55976
ENSG00000136824	SMC2	protein_coding	6470	1.87154	1.48642	0.519019	0.436165	0.332384	1.91884e-11	4.84376e-11	3.56215
ENSG00000123689	G0S2	protein_coding	876	1.62357	1.32909	0.294234	0.496835	0.288736	3.43837e-13	1.16301e-12	3.5987
ENSG00000166197	NOLC1	protein_coding	3970	1.73802	1.39007	0.447102	0.422187	0.32229	6.82018e-12	1.84237e-11	3.59875
ENSG00000070087	PFN2	protein_coding	3709	4.55785	3.4947	1.39476	0.522571	0.383186	3.1454e-10	6.76686e-10	3.64115
ENSG00000150347	ARID5B	protein_coding	8760	3.1279	2.40929	1.012	0.507752	0.376586	1.83776e-10	4.07859e-10	3.66633
ENSG00000128340	RAC2	protein_coding	2523	2.29386	1.81712	0.714314	0.468581	0.336121	1.08632e-11	2.86001e-11	3.68525
ENSG00000105447	GRWD1	protein_coding	5627	1.67541	1.34361	0.408905	0.425647	0.318395	2.56085e-12	7.53118e-12	3.69071
ENSG00000101871	MID1	protein_coding	9246	1.34493	1.10695	0.217301	0.34941	0.280943	6.38398e-14	2.3599e-13	3.70702
ENSG00000117395	EBNA1BP2	protein_coding	3561	3.38336	2.65073	1.13124	0.428485	0.35207	2.57802e-11	6.373e-11	3.72797
ENSG00000099783	HNRNPM	protein_coding	5614	3.35457	2.52924	1.06333	0.548957	0.407426	6.95244e-10	1.41901e-09	3.73116
ENSG00000079462	PAFAH1B3	protein_coding	1419	1.88978	1.50775	0.530349	0.443554	0.325825	3.21682e-12	9.21074e-12	3.74456
ENSG00000132383	RPA1	protein_coding	5492	2.88759	2.1755	0.908848	0.551719	0.40852	6.59179e-10	1.357e-09	3.75062
ENSG00000148229	POLE3	protein_coding	2607	2.87123	2.2408	0.938055	0.490947	0.357653	2.97054e-11	7.29799e-11	3.76507
ENSG00000099250	NRP1	protein_coding	11522	3.11923	2.42281	1.01369	0.510736	0.364512	4.6225e-11	1.10606e-10	3.76728
ENSG00000169299	PGM2	protein_coding	3677	1.71779	1.385	0.453087	0.401828	0.31067	7.01416e-13	2.25739e-12	3.77589
ENSG00000146701	MDH2	protein_coding	3641	5.85312	4.59071	1.68625	0.405311	0.350486	1.39463e-11	3.57336e-11	3.80472
ENSG00000125505	MBOAT7	protein_coding	5292	2.12884	1.58485	0.598721	0.528303	0.425716	1.12692e-09	2.24596e-09	3.80935
ENSG00000113810	SMC4	protein_coding	8164	1.87989	1.51761	0.538564	0.418105	0.308841	4.51842e-13	1.48622e-12	3.81265
ENSG00000100749	VRK1	protein_coding	2662	2.17228	1.69243	0.632958	0.504417	0.360116	2.36039e-11	5.88372e-11	3.82696
ENSG00000166226	CCT2	protein_coding	4230	4.39922	3.44533	1.39007	0.444713	0.352603	1.35684e-11	3.48401e-11	3.83191
ENSG00000182004	SNRPE	protein_coding	2080	1.83378	1.45165	0.524324	0.39242	0.337126	4.13784e-12	1.16523e-11	3.83759
ENSG00000169607	CKAP2L	protein_coding	5464	1.91788	1.52166	0.53467	0.471321	0.333864	2.9687e-12	8.60347e-12	3.8486
ENSG00000108829	LRRC59	protein_coding	4540	3.84466	2.91851	1.21046	0.540228	0.397625	1.87377e-10	4.1508e-10	3.86781
ENSG00000123485	HJURP	protein_coding	3821	1.94622	1.52174	0.523945	0.498248	0.354953	1.24691e-11	3.22253e-11	3.87046
ENSG00000162909	CAPN2	protein_coding	8585	8.67907	6.4107	1.98192	0.618499	0.43706	1.34212e-09	2.64001e-09	3.87769
ENSG00000065328	MCM10	protein_coding	5454	1.58809	1.3013	0.372214	0.404495	0.287341	2.88755e-14	1.11577e-13	3.89044
ENSG00000100116	GCAT	protein_coding	2104	1.5346	1.25602	0.355633	0.357252	0.289001	3.32485e-14	1.26833e-13	3.89522
ENSG00000102054	RBBP7	protein_coding	7392	3.34636	2.5776	1.10173	0.465096	0.376562	3.91758e-11	9.50731e-11	3.91888
ENSG00000138180	CEP55	protein_coding	3291	1.71398	1.40762	0.445294	0.412731	0.284097	5.68529e-15	2.44181e-14	4.04704
ENSG00000129351	ILF3	protein_coding	11022	2.18448	1.69191	0.665739	0.466603	0.368642	1.02106e-11	2.70321e-11	4.05173
ENSG00000095002	MSH2	protein_coding	13674	1.98754	1.59923	0.581193	0.452115	0.313603	1.14518e-13	4.13095e-13	4.05838
ENSG00000113578	FGF1	protein_coding	4980	1.76598	1.40199	0.466869	0.425087	0.332993	6.23326e-13	2.02417e-12	4.06427
ENSG00000075218	GTSE1	protein_coding	4113	1.5085	1.18604	0.290731	0.42135	0.346958	1.65098e-12	5.10691e-12	4.08794
ENSG00000132305	IMMT	protein_coding	3986	2.81543	2.19213	0.918131	0.485686	0.361023	4.54818e-12	1.26586e-11	4.09478
ENSG00000058262	SEC61A1	protein_coding	4640	7.54245	5.70824	1.8942	0.525317	0.401988	6.291e-11	1.48742e-10	4.10079
ENSG00000100029	PES1	protein_coding	4527	1.96291	1.48523	0.513186	0.537571	0.402306	6.35215e-11	1.49595e-10	4.10234
ENSG00000157020	SEC13	protein_coding	5380	8.49616	6.69717	2.0672	0.410375	0.34326	1.04798e-12	3.3103e-12	4.11214
ENSG00000137563	GGH	protein_coding	2765	3.18097	2.46991	1.03497	0.50277	0.365005	5.30685e-12	1.45664e-11	4.11549
ENSG00000111845	PAK1IP1	protein_coding	1523	2.00869	1.56335	0.60186	0.420683	0.361613	3.96002e-12	1.11779e-11	4.12322
ENSG00000187608	ISG15	protein_coding	867	2.09494	1.63225	0.626583	0.46272	0.360048	3.1485e-12	9.0368e-12	4.14123
ENSG00000084070	SMAP2	protein_coding	3601	1.3828	1.14952	0.261278	0.327994	0.266556	2.73585e-16	1.45831e-15	4.14839
ENSG00000138160	KIF11	protein_coding	5016	1.88124	1.46905	0.507096	0.480691	0.356796	2.32308e-12	6.95179e-12	4.15094
ENSG00000167747	C19orf48	protein_coding	3256	3.56811	2.65994	1.10397	0.590957	0.423767	1.45879e-10	3.29886e-10	4.16818
ENSG00000136492	BRIP1	protein_coding	10125	1.54218	1.24069	0.343286	0.400754	0.313829	5.03108e-14	1.87722e-13	4.17341
ENSG00000000460	C1orf112	protein_coding	5970	1.39328	1.16716	0.258712	0.337068	0.255488	4.44172e-17	2.65171e-16	4.17786
ENSG00000139921	TMX1	protein_coding	4608	2.70584	2.06958	0.868763	0.508579	0.38674	1.50142e-11	3.83874e-11	4.18588
ENSG00000107937	GTPBP4	protein_coding	6121	2.85135	2.25124	0.958457	0.437079	0.340927	4.8585e-13	1.58933e-12	4.19801
ENSG00000144354	CDCA7	protein_coding	3934	1.27367	1.07025	0.187917	0.301074	0.251041	1.76553e-17	1.11537e-16	4.20571
ENSG00000163468	CCT3	protein_coding	3864	6.2247	4.77177	1.72976	0.460587	0.38348	1.02472e-11	2.7069e-11	4.21421
ENSG00000115233	PSMD14	protein_coding	7311	4.59403	3.49569	1.41371	0.492103	0.394181	2.03376e-11	5.12303e-11	4.21446
ENSG00000112312	GMNN	protein_coding	2476	2.35704	1.86666	0.752874	0.464785	0.33652	2.91444e-13	9.97089e-13	4.21842
ENSG00000171824	EXOSC10	protein_coding	5991	2.29876	1.78446	0.722367	0.470671	0.365371	2.37069e-12	7.07651e-12	4.24749
ENSG00000176170	SPHK1	protein_coding	4416	2.4438	1.78492	0.677955	0.616048	0.453264	3.84853e-10	8.19098e-10	4.26734
ENSG00000120699	EXOSC8	protein_coding	3389	2.46034	1.90598	0.790471	0.463611	0.368322	2.55088e-12	7.52036e-12	4.27008
ENSG00000099194	SCD	protein_coding	5245	2.16765	1.64827	0.620614	0.525213	0.395174	1.52791e-11	3.89814e-11	4.27416
ENSG00000109323	MANBA	protein_coding	11743	1.44077	1.18582	0.284903	0.36553	0.280959	5.88568e-16	2.91597e-15	4.27906
ENSG00000173540	GMPPB	protein_coding	6742	1.94667	1.512	0.543871	0.473656	0.364555	1.7794e-12	5.46172e-12	4.28342
ENSG00000189159	JPT1	protein_coding	3406	4.49051	3.36875	1.37336	0.510642	0.414667	4.1866e-11	1.0119e-10	4.30347
ENSG00000146376	ARHGAP18	protein_coding	4592	2.34938	1.79669	0.72987	0.486426	0.386942	7.1122e-12	1.9126e-11	4.31363
ENSG00000137310	TCF19	protein_coding	3533	2.1648	1.6918	0.643812	0.500107	0.355671	7.00184e-13	2.25739e-12	4.3231
ENSG00000119969	HELLS	protein_coding	10150	1.71517	1.38744	0.453443	0.402039	0.305926	6.94572e-15	2.93462e-14	4.33138
ENSG00000124207	CSE1L	protein_coding	3800	3.85933	2.96049	1.23127	0.509704	0.382512	4.21009e-12	1.18279e-11	4.35135
ENSG00000057019	DCBLD2	protein_coding	11280	3.37454	2.5763	1.08854	0.516094	0.38939	5.97867e-12	1.63353e-11	4.37028
ENSG00000149136	SSRP1	protein_coding	6337	2.84468	2.10669	0.893986	0.54721	0.43329	7.73591e-11	1.80757e-10	4.38121
ENSG00000105202	FBL	protein_coding	2138	2.24871	1.71802	0.677505	0.493578	0.388355	5.16603e-12	1.43057e-11	4.3833
ENSG00000156261	CCT8	protein_coding	3341	4.4748	3.40678	1.39045	0.473021	0.393412	7.04966e-12	1.90007e-11	4.38727
ENSG00000065534	MYLK	protein_coding	22167	2.64673	1.87718	0.756304	0.618069	0.495643	1.28643e-09	2.53465e-09	4.40657
ENSG00000091136	LAMB1	protein_coding	8072	1.97344	1.51536	0.522383	0.522675	0.38105	2.64523e-12	7.74118e-12	4.41162
ENSG00000116455	WDR77	protein_coding	2685	2.11434	1.64835	0.654843	0.417225	0.359185	3.93346e-13	1.31189e-12	4.45577
ENSG00000123473	STIL	protein_coding	7291	1.69374	1.30138	0.409336	0.448287	0.380177	1.79432e-12	5.49339e-12	4.4656
ENSG00000240342	RPS2P5	processed_pseudogene	879	1.45777	1.19578	0.310474	0.336477	0.285814	2.1496e-16	1.15614e-15	4.47802
ENSG00000102900	NUP93	protein_coding	11123	2.23356	1.7059	0.686514	0.478958	0.388814	2.75322e-12	8.03751e-12	4.49476
ENSG00000147274	RBMX	protein_coding	5882	2.63847	2.00212	0.858301	0.456116	0.39817	4.31273e-12	1.20595e-11	4.5253
ENSG00000130713	EXOSC2	protein_coding	4240	1.90911	1.48186	0.546523	0.428193	0.365492	3.83486e-13	1.28258e-12	4.53804
ENSG00000058804	NDC1	protein_coding	4720	1.66424	1.29597	0.407741	0.428969	0.360828	2.62363e-13	9.0538e-13	4.53962
ENSG00000092470	WDR76	protein_coding	4054	1.59622	1.28708	0.385867	0.382495	0.310553	1.7981e-15	8.32912e-15	4.57917
ENSG00000008838	MED24	protein_coding	6962	1.64444	1.26397	0.360828	0.46252	0.379636	8.01317e-13	2.55822e-12	4.59215
ENSG00000114861	FOXP1	protein_coding	36714	1.92763	1.46502	0.549595	0.435789	0.395909	2.28322e-12	6.84966e-12	4.60896
ENSG00000142173	COL6A2	protein_coding	5334	3.22149	1.87401	0.74822	0.852379	0.781598	1.25286e-06	1.78937e-06	4.61307
ENSG00000114850	SSR3	protein_coding	4627	7.9673	5.90873	1.96228	0.493882	0.431242	1.90015e-11	4.81695e-11	4.62344
ENSG00000183520	UTP11	protein_coding	3381	2.34672	1.78166	0.743456	0.457176	0.397429	2.18235e-12	6.57301e-12	4.63445
ENSG00000144554	FANCD2	protein_coding	8378	1.40904	1.17894	0.28052	0.330449	0.257223	9.44501e-19	6.83491e-18	4.63639
ENSG00000185420	SMYD3	protein_coding	5866	2.08008	1.52669	0.575933	0.511994	0.446229	3.99235e-11	9.6691e-11	4.64023
ENSG00000169439	SDC2	protein_coding	4084	3.20812	2.39076	1.02437	0.526965	0.424258	1.14828e-11	3.00668e-11	4.64136
ENSG00000128228	SDF2L1	protein_coding	1059	1.91215	1.47794	0.551212	0.427784	0.371601	3.17289e-13	1.07933e-12	4.64447
ENSG00000100883	SRP54	protein_coding	3903	2.55406	1.90598	0.816757	0.492548	0.422256	9.85309e-12	2.61435e-11	4.64753
ENSG00000145526	CDH18	protein_coding	6485	1.28179	1.0602	0.17903	0.33454	0.273825	9.45388e-18	6.16827e-17	4.6617
ENSG00000074410	CA12	protein_coding	6998	1.81778	1.38805	0.477903	0.460304	0.389116	9.51764e-13	3.03042e-12	4.67774
ENSG00000115963	RND3	protein_coding	3594	8.59592	5.91574	1.88839	0.695111	0.539093	1.86014e-09	3.54794e-09	4.70653
ENSG00000116791	CRYZ	protein_coding	4085	2.10876	1.63477	0.626065	0.472306	0.367304	1.5125e-13	5.40696e-13	4.70895
ENSG00000203760	CENPW	protein_coding	795	1.9636	1.50964	0.568915	0.442655	0.379295	3.80021e-13	1.27511e-12	4.71092
ENSG00000165501	LRR1	protein_coding	2295	1.6115	1.29905	0.403083	0.371239	0.310942	6.92644e-16	3.40336e-15	4.71372
ENSG00000125835	SNRPB	protein_coding	1278	6.73815	5.12962	1.82817	0.398366	0.393501	1.03894e-12	3.29044e-12	4.71549
ENSG00000103043	VAC14	protein_coding	8275	1.6916	1.2814	0.39622	0.461026	0.400667	1.58047e-12	4.90152e-12	4.72836
ENSG00000131467	PSME3	protein_coding	5154	3.5425	2.75851	1.18016	0.428169	0.360878	7.6542e-14	2.80341e-13	4.73331
ENSG00000167088	SNRPD1	protein_coding	4862	3.21641	2.43875	1.05559	0.481306	0.399308	1.17112e-12	3.67014e-12	4.76431
ENSG00000094804	CDC6	protein_coding	5311	2.47718	1.89533	0.757851	0.539365	0.386248	4.45931e-13	1.47491e-12	4.77045
ENSG00000164949	GEM	protein_coding	2648	1.55949	1.22034	0.357361	0.397385	0.353789	3.2128e-14	1.23347e-13	4.77371
ENSG00000011485	PPP5C	protein_coding	7089	2.20654	1.63217	0.623474	0.555818	0.434996	9.79304e-12	2.60421e-11	4.78891
ENSG00000095319	NUP188	protein_coding	8041	2.17345	1.55653	0.561404	0.594977	0.481651	1.14027e-10	2.59331e-10	4.78905
ENSG00000100266	PACSIN2	protein_coding	4558	1.84833	1.42285	0.467902	0.494139	0.377438	1.95381e-13	6.92242e-13	4.79691
ENSG00000069431	ABCC9	protein_coding	11616	1.29021	1.07588	0.20056	0.304707	0.262085	4.95618e-19	3.81786e-18	4.79743
ENSG00000086061	DNAJA1	protein_coding	2668	5.66248	4.2733	1.63292	0.462008	0.406082	1.29489e-12	4.02631e-12	4.8274
ENSG00000184009	ACTG1	protein_coding	2920	129.934	99.0564	4.7914	0.379103	0.39146	4.61213e-13	1.51288e-12	4.82909
ENSG00000091651	ORC6	protein_coding	4309	1.9594	1.54154	0.577133	0.430938	0.346037	1.06614e-14	4.37447e-14	4.83489
ENSG00000276043	UHRF1	protein_coding	5145	1.44796	1.12149	0.256026	0.414998	0.368608	7.63729e-14	2.80341e-13	4.83505
ENSG00000127022	CANX	protein_coding	6951	7.0929	5.43258	1.85483	0.486763	0.384739	2.59352e-13	8.97582e-13	4.84236
ENSG00000123975	CKS2	protein_coding	616	2.34274	1.72424	0.70519	0.521891	0.442236	1.08747e-11	2.86001e-11	4.84849
ENSG00000070950	RAD18	protein_coding	6984	1.77371	1.3776	0.476904	0.416209	0.364613	4.81932e-14	1.80384e-13	4.85556
ENSG00000169045	HNRNPH1	protein_coding	9480	2.99543	2.28453	0.989462	0.471187	0.390868	3.00446e-13	1.02495e-12	4.89454
ENSG00000170779	CDCA4	protein_coding	2448	2.05312	1.52922	0.592364	0.487434	0.425021	3.03198e-12	8.74442e-12	4.89551
ENSG00000115091	ACTR3	protein_coding	11946	9.44914	7.22065	2.1559	0.446835	0.388054	2.08001e-13	7.32607e-13	4.92128
ENSG00000167325	RRM1	protein_coding	4233	4.67194	3.47232	1.39405	0.586177	0.428122	3.00825e-12	8.69696e-12	4.93269
ENSG00000109332	UBE2D3	protein_coding	10044	6.08909	4.47483	1.6896	0.503469	0.444394	7.3307e-12	1.96693e-11	4.94826
ENSG00000144369	FAM171B	protein_coding	5731	1.63231	1.28021	0.369484	0.443739	0.350531	6.9556e-15	2.93462e-14	4.96271
ENSG00000087586	AURKA	protein_coding	2928	2.23543	1.69064	0.654281	0.522291	0.40298	3.80183e-13	1.27511e-12	5.00502
ENSG00000108424	KPNB1	protein_coding	7637	4.19806	3.07549	1.279	0.576581	0.448908	5.45542e-12	1.49398e-11	5.05613
ENSG00000139211	AMIGO2	protein_coding	3956	1.71247	1.3254	0.425031	0.446296	0.369647	1.57761e-14	6.29989e-14	5.10187
ENSG00000111716	LDHB	polymorphic_pseudogene	2983	2.32134	1.74187	0.724607	0.466804	0.41432	4.32371e-13	1.43802e-12	5.12271
ENSG00000152049	KCNE4	protein_coding	4124	1.43765	1.17645	0.279893	0.363297	0.289271	1.71948e-18	1.20768e-17	5.13878
ENSG00000146670	CDCA5	protein_coding	3901	2.01011	1.53497	0.544047	0.511759	0.389063	5.20089e-14	1.93454e-13	5.16829
ENSG00000149948	HMGA2	protein_coding	15403	1.56519	1.28824	0.382181	0.345672	0.280932	3.73418e-19	2.91412e-18	5.17696
ENSG00000170540	ARL6IP1	protein_coding	3558	3.42079	2.3834	0.994358	0.6583	0.521307	1.07797e-10	2.46569e-10	5.19607
ENSG00000149257	SERPINH1	protein_coding	6281	6.29486	4.2791	1.60275	0.715323	0.556865	4.52169e-10	9.52187e-10	5.20374
ENSG00000197170	PSMD12	protein_coding	5342	2.71044	2.05102	0.885717	0.481165	0.402188	1.06547e-13	3.85506e-13	5.21737
ENSG00000121621	KIF18A	protein_coding	4517	1.59634	1.26081	0.37966	0.400894	0.340418	4.41807e-16	2.26402e-15	5.22704
ENSG00000165280	VCP	protein_coding	4816	7.88135	5.55437	1.89099	0.625195	0.50482	4.35589e-11	1.04857e-10	5.2304
ENSG00000100297	MCM5	protein_coding	7268	2.6736	1.93595	0.811311	0.576532	0.465747	5.23708e-12	1.4408e-11	5.25405
ENSG00000120438	TCP1	protein_coding	4883	5.24647	4.04684	1.57282	0.433792	0.37455	7.84052e-15	3.27328e-14	5.28328
ENSG00000121152	NCAPH	protein_coding	6545	1.88916	1.45117	0.513133	0.47838	0.380521	1.22119e-14	4.97647e-14	5.29428
ENSG00000168078	PBK	protein_coding	2148	2.7015	2.022	0.812085	0.593446	0.417975	2.05741e-13	7.2679e-13	5.30271
ENSG00000144355	DLX1	protein_coding	3570	1.27027	1.05678	0.191588	0.286904	0.265465	9.06553e-21	8.20019e-20	5.32061
ENSG00000112029	FBXO5	protein_coding	3856	1.93764	1.49819	0.554139	0.451463	0.37108	4.19203e-15	1.84018e-14	5.33523
ENSG00000180914	OXTR	protein_coding	4514	3.27359	2.24749	0.942658	0.675832	0.54256	1.11489e-10	2.54042e-10	5.39997
ENSG00000015475	BID	protein_coding	4446	1.9544	1.52846	0.581007	0.409025	0.35465	5.73562e-16	2.86541e-15	5.40537
ENSG00000110880	CORO1C	protein_coding	6532	11.1924	8.51112	2.33001	0.433437	0.395103	1.85608e-14	7.33829e-14	5.42531
ENSG00000010292	NCAPD2	protein_coding	6470	1.91832	1.37868	0.490082	0.537032	0.476556	3.62671e-12	1.02613e-11	5.45203
ENSG00000096060	FKBP5	protein_coding	10628	1.26384	1.04916	0.170079	0.303895	0.268579	4.19869e-21	3.85634e-20	5.47281
ENSG00000187514	PTMA	protein_coding	3378	4.51288	3.40366	1.41352	0.448566	0.406963	3.30674e-14	1.26546e-13	5.4861
ENSG00000198467	TPM2	protein_coding	3183	24.3261	17.7004	3.06806	0.505893	0.458725	1.09753e-12	3.44856e-12	5.48616
ENSG00000164104	HMGB2	protein_coding	2401	4.35984	3.11847	1.28784	0.625742	0.48344	4.24211e-12	1.18899e-11	5.49789
ENSG00000131153	GINS2	protein_coding	3219	2.51229	1.86187	0.783618	0.516459	0.432247	1.83978e-13	6.53778e-13	5.50476
ENSG00000117632	STMN1	protein_coding	6247	18.8484	13.3227	2.76273	0.620962	0.500554	9.06994e-12	2.4173e-11	5.52731
ENSG00000112118	MCM3	protein_coding	3645	3.55673	2.53162	1.03684	0.677655	0.49049	5.17592e-12	1.43057e-11	5.53568
ENSG00000168386	FILIP1L	protein_coding	5903	1.59752	1.27275	0.388485	0.382223	0.327884	1.29862e-17	8.42689e-17	5.53681
ENSG00000141698	NT5C3B	protein_coding	2851	1.97355	1.49346	0.578227	0.429078	0.402133	1.68434e-14	6.68138e-14	5.53881
ENSG00000137807	KIF23	protein_coding	6576	2.682	1.98303	0.81758	0.573877	0.435598	1.26345e-13	4.54386e-13	5.61854
ENSG00000109971	HSPA8	protein_coding	4849	21.9792	16.5807	3.01077	0.41883	0.406637	1.38865e-14	5.63963e-14	5.63494
ENSG00000101057	MYBL2	protein_coding	2776	1.97331	1.37806	0.466896	0.581075	0.517984	1.21175e-11	3.14529e-11	5.65461
ENSG00000106366	SERPINE1	protein_coding	3156	56.2877	40.5369	3.88008	0.572822	0.473583	1.06432e-12	3.35304e-12	5.67018
ENSG00000162521	RBBP4	protein_coding	9470	2.48991	1.8276	0.800753	0.479549	0.446146	1.32223e-13	4.74096e-13	5.74577
ENSG00000079246	XRCC5	protein_coding	5463	7.10412	5.35761	1.87674	0.41593	0.407066	7.59812e-15	3.18321e-14	5.74749
ENSG00000103196	CRISPLD2	protein_coding	7962	1.49118	1.15426	0.294401	0.414081	0.369484	2.11552e-16	1.14815e-15	5.79151
ENSG00000147140	NONO	protein_coding	5292	5.09816	3.79723	1.52602	0.486907	0.425028	2.07782e-14	8.14426e-14	5.8154
ENSG00000048162	NOP16	protein_coding	2862	2.41574	1.772	0.772689	0.471568	0.447086	8.15041e-14	2.96695e-13	5.85183
ENSG00000115368	WDR75	protein_coding	5040	1.87249	1.4127	0.520944	0.436842	0.4065	3.12289e-15	1.39653e-14	5.89646
ENSG00000159200	RCAN1	protein_coding	6964	2.84883	2.03385	0.87777	0.572573	0.48616	7.09728e-13	2.278e-12	5.90631
ENSG00000159167	STC1	protein_coding	4134	1.86871	1.33814	0.425845	0.551128	0.481819	4.5182e-13	1.48622e-12	5.94807
ENSG00000197043	ANXA6	protein_coding	5478	7.09937	5.04123	1.80618	0.593111	0.493915	7.96256e-13	2.54887e-12	5.97585
ENSG00000159176	CSRP1	protein_coding	10318	7.13418	5.03998	1.82297	0.550303	0.501329	9.92917e-13	3.15304e-12	6.01749
ENSG00000075624	ACTB	protein_coding	3413	261.929	202.999	5.52532	0.29381	0.367704	4.04167e-17	2.43725e-16	6.02794
ENSG00000112078	KCTD20	protein_coding	6239	2.06996	1.54686	0.612774	0.465586	0.420255	4.46179e-15	1.9443e-14	6.03087
ENSG00000100714	MTHFD1	protein_coding	12208	2.55495	1.93636	0.822203	0.481558	0.399947	7.07513e-16	3.46218e-15	6.0593
ENSG00000133816	MICAL2	protein_coding	20191	2.10818	1.59508	0.632505	0.455835	0.402369	7.40569e-16	3.60914e-15	6.08802
ENSG00000144824	PHLDB2	protein_coding	12309	1.43335	1.1332	0.287843	0.352477	0.338986	6.09473e-19	4.5768e-18	6.17464
ENSG00000117114	ADGRL2	protein_coding	7754	1.47592	1.17313	0.297678	0.387711	0.331249	2.21051e-19	1.78334e-18	6.17961
ENSG00000133119	RFC3	protein_coding	2858	1.80265	1.3759	0.481023	0.443175	0.38974	1.29392e-16	7.25326e-16	6.19223
ENSG00000071539	TRIP13	protein_coding	3319	2.83359	2.07097	0.890298	0.534459	0.452326	1.42474e-14	5.7471e-14	6.26303
ENSG00000091483	FH	protein_coding	2142	2.37161	1.74141	0.751866	0.468293	0.445609	6.67486e-15	2.84635e-14	6.31675
ENSG00000109805	NCAPG	protein_coding	4847	2.16337	1.59795	0.626577	0.526239	0.437057	2.422e-15	1.108e-14	6.38795
ENSG00000105011	ASF1B	protein_coding	1958	2.88224	2.08953	0.907248	0.556809	0.464014	1.65332e-14	6.5802e-14	6.39487
ENSG00000154473	BUB3	protein_coding	8175	6.326	4.5426	1.73053	0.487086	0.477777	3.59764e-14	1.35936e-13	6.42323
ENSG00000131459	GFPT2	protein_coding	4721	1.48687	1.1688	0.297216	0.402374	0.347246	2.93322e-19	2.30412e-18	6.43539
ENSG00000115484	CCT4	protein_coding	2701	4.37741	3.25725	1.38912	0.442364	0.426422	7.49065e-16	3.63571e-15	6.44983
ENSG00000174442	ZWILCH	protein_coding	4851	2.4501	1.79886	0.77662	0.493931	0.44576	2.55393e-15	1.16389e-14	6.50488
ENSG00000179115	FARSA	protein_coding	2434	3.08462	2.09228	0.924154	0.63013	0.560018	1.90968e-12	5.8316e-12	6.56287
ENSG00000113368	LMNB1	protein_coding	3633	1.63537	1.22692	0.374675	0.447958	0.414577	1.05853e-16	5.98999e-16	6.62299
ENSG00000068366	ACSL4	protein_coding	6546	2.03976	1.50879	0.598289	0.458297	0.435012	5.52783e-16	2.7732e-15	6.63717
ENSG00000143799	PARP1	protein_coding	7183	3.22796	2.23183	0.963507	0.628929	0.532398	2.84154e-13	9.74941e-13	6.6797
ENSG00000005022	SLC25A5	protein_coding	1555	7.3004	5.39545	1.90651	0.422334	0.436231	4.07721e-16	2.10744e-15	6.71344
ENSG00000156970	BUB1B	protein_coding	4476	1.75974	1.33906	0.441194	0.472599	0.394145	8.54555e-18	5.63723e-17	6.72737
ENSG00000165304	MELK	protein_coding	3087	2.78689	2.03396	0.885527	0.539894	0.454368	1.30717e-15	6.16901e-15	6.76266
ENSG00000225206	MIR137HG	lncRNA	9599	1.29291	1.04016	0.195272	0.313728	0.313814	2.14762e-22	2.33115e-21	6.79974
ENSG00000183963	SMTN	protein_coding	10242	1.91363	1.33015	0.460732	0.557508	0.524716	8.87371e-14	3.22043e-13	6.84854
ENSG00000162702	ZNF281	protein_coding	4895	1.93225	1.46057	0.552019	0.439586	0.40375	8.34204e-18	5.53356e-17	6.89553
ENSG00000112081	SRSF3	protein_coding	7118	7.94517	5.68732	1.95283	0.50795	0.482329	4.21167e-15	1.84203e-14	6.93375
ENSG00000108561	C1QBP	protein_coding	2335	4.52752	3.26277	1.40928	0.451274	0.472624	1.95306e-15	9.00369e-15	6.95195
ENSG00000171793	CTPS1	protein_coding	11164	3.14093	2.30963	1.00976	0.524776	0.443526	2.0621e-16	1.12943e-15	6.95702
ENSG00000080986	NDC80	protein_coding	3554	2.10072	1.50207	0.605694	0.51764	0.483928	2.91868e-15	1.31506e-14	7.0338
ENSG00000161981	SNRNP25	protein_coding	2242	1.90574	1.45309	0.559189	0.403829	0.391232	9.44522e-19	6.83491e-18	7.05187
ENSG00000164611	PTTG1	protein_coding	1975	3.10208	2.18293	0.961638	0.587037	0.506968	1.16063e-14	4.74586e-14	7.06476
ENSG00000134910	STT3A	protein_coding	7369	5.4139	3.86165	1.57108	0.517451	0.487451	3.0865e-15	1.38544e-14	7.07317
ENSG00000111799	COL12A1	protein_coding	12483	3.30408	2.27075	1.0014	0.607871	0.541077	7.47032e-14	2.75295e-13	7.10253
ENSG00000144867	SRPRB	protein_coding	4190	4.77794	3.45775	1.45256	0.488624	0.466553	4.46237e-16	2.26726e-15	7.16178
ENSG00000142945	KIF2C	protein_coding	3646	1.82362	1.31565	0.464702	0.497127	0.471027	5.80194e-16	2.88646e-15	7.17677
ENSG00000148773	MKI67	protein_coding	12845	3.05517	2.15547	0.874891	0.673585	0.50325	4.56607e-15	1.9825e-14	7.21683
ENSG00000181163	NPM1	protein_coding	3828	4.16775	3.02802	1.32988	0.465849	0.460898	2.00504e-16	1.1135e-15	7.23512
ENSG00000128050	PAICS	protein_coding	7517	3.6937	2.66097	1.18761	0.511546	0.473115	4.4421e-16	2.26661e-15	7.26345
ENSG00000203875	SNHG5	lncRNA	12604	1.89901	1.44087	0.546333	0.409155	0.398305	5.5128e-19	4.19254e-18	7.27251
ENSG00000180611	MB21D2	protein_coding	3063	1.5077	1.16479	0.33035	0.376496	0.372276	2.31535e-20	2.03274e-19	7.30978
ENSG00000088325	TPX2	protein_coding	3605	4.18688	2.87135	1.19136	0.691493	0.544146	3.55059e-14	1.34584e-13	7.31861
ENSG00000160193	WDR4	protein_coding	2738	1.58707	1.19653	0.335899	0.421461	0.407514	1.08614e-18	7.81237e-18	7.32063
ENSG00000101447	FAM83D	protein_coding	2475	1.62624	1.18545	0.360855	0.45898	0.456108	5.96375e-17	3.54265e-16	7.40011
ENSG00000145681	HAPLN1	protein_coding	6198	1.40431	1.05335	0.204876	0.422045	0.414874	1.2479e-18	8.869e-18	7.42784
ENSG00000146918	NCAPG2	protein_coding	7105	2.18755	1.56182	0.631929	0.522041	0.486094	4.95947e-16	2.50916e-15	7.43946
ENSG00000070814	TCOF1	protein_coding	11439	1.61921	1.18604	0.350505	0.461943	0.449135	1.67706e-17	1.06511e-16	7.53444
ENSG00000175130	MARCKSL1	protein_coding	1546	1.83852	1.40641	0.509147	0.417577	0.386526	3.0509e-20	2.65896e-19	7.54327
ENSG00000029993	HMGB3	protein_coding	3914	1.89898	1.4006	0.5372	0.435172	0.439179	5.69794e-18	3.88762e-17	7.57332
ENSG00000134668	SPOCD1	protein_coding	7085	2.35516	1.68174	0.738179	0.478205	0.485864	2.02898e-16	1.12158e-15	7.62453
ENSG00000168439	STIP1	protein_coding	4657	2.99115	2.0395	0.915646	0.594286	0.552481	1.50908e-14	6.04646e-14	7.636
ENSG00000122566	HNRNPA2B1	protein_coding	9267	12.5102	9.05844	2.44617	0.41345	0.465766	3.48351e-17	2.13298e-16	7.66558
ENSG00000171724	VAT1L	protein_coding	4103	1.27334	1.04102	0.182085	0.306315	0.290626	3.8763e-27	6.34014e-26	7.67588
ENSG00000053372	MRTO4	protein_coding	2556	2.50222	1.7965	0.813762	0.454866	0.478019	8.53491e-17	4.94693e-16	7.68119
ENSG00000136261	BZW2	protein_coding	3662	2.33531	1.70787	0.758497	0.428302	0.451419	8.96574e-18	5.88192e-17	7.69553
ENSG00000171208	NETO2	protein_coding	7429	1.28532	1.05172	0.198621	0.289903	0.289377	1.18921e-27	2.05786e-26	7.7914
ENSG00000168496	FEN1	protein_coding	2198	2.77701	1.98919	0.888859	0.511226	0.481355	6.44113e-17	3.80728e-16	7.79363
ENSG00000136960	ENPP2	protein_coding	6729	4.29653	2.7579	1.1908	0.720062	0.639599	6.37762e-13	2.06365e-12	7.80013
ENSG00000090889	KIF4A	protein_coding	4573	1.6098	1.19639	0.378782	0.414063	0.428191	5.36255e-19	4.10442e-18	7.82331
ENSG00000164109	MAD2L1	protein_coding	5517	2.41809	1.66585	0.710338	0.563202	0.537613	2.79295e-15	1.26318e-14	7.82439
ENSG00000138071	ACTR2	protein_coding	4347	7.24555	5.29336	1.89178	0.454813	0.452913	5.13843e-18	3.52603e-17	7.83049
ENSG00000176788	BASP1	protein_coding	2146	2.31459	1.6358	0.697714	0.512602	0.500758	2.09194e-16	1.14054e-15	7.85161
ENSG00000171241	SHCBP1	protein_coding	6175	2.85502	2.05317	0.89988	0.553998	0.475644	2.73225e-17	1.69032e-16	7.87832
ENSG00000126457	PRMT1	protein_coding	4796	5.40251	3.83021	1.58665	0.472382	0.496205	9.72466e-17	5.55562e-16	7.94529
ENSG00000148248	SURF4	protein_coding	3445	7.66539	5.35307	1.92274	0.482759	0.517994	4.1418e-16	2.1316e-15	7.9682
ENSG00000072274	TFRC	protein_coding	7794	2.66079	1.85351	0.826213	0.551424	0.521595	5.25986e-16	2.6499e-15	7.96946
ENSG00000152952	PLOD2	protein_coding	7663	2.02908	1.43951	0.576769	0.48705	0.495255	6.58446e-17	3.87283e-16	8.01395
ENSG00000134690	CDCA8	protein_coding	2406	2.14017	1.53435	0.598692	0.54017	0.4801	1.3125e-17	8.47096e-17	8.105
ENSG00000198363	ASPH	protein_coding	20047	8.13145	5.84659	1.99709	0.460541	0.475916	6.76914e-18	4.5663e-17	8.17123
ENSG00000041982	TNC	protein_coding	9639	3.03264	1.99696	0.861883	0.66682	0.60277	2.0804e-14	8.14426e-14	8.24702
ENSG00000112742	TTK	protein_coding	4579	1.70194	1.25395	0.420258	0.446624	0.440697	1.16508e-19	9.66045e-19	8.344
ENSG00000237649	KIFC1	protein_coding	3030	2.5974	1.76008	0.75109	0.631381	0.561432	1.17755e-15	5.57934e-15	8.38164
ENSG00000184661	CDCA2	protein_coding	3697	2.12862	1.46751	0.594058	0.540705	0.536546	2.06034e-16	1.12943e-15	8.4163
ENSG00000131747	TOP2A	protein_coding	6374	4.31765	2.89588	1.1983	0.733234	0.576245	2.20763e-15	1.01381e-14	8.44549
ENSG00000109861	CTSC	protein_coding	11395	2.41855	1.68016	0.700991	0.56911	0.525547	7.66568e-17	4.46479e-16	8.46942
ENSG00000104635	SLC39A14	protein_coding	6937	2.73306	1.85158	0.842498	0.560492	0.561758	7.64675e-16	3.69645e-15	8.49183
ENSG00000123136	DDX39A	protein_coding	3861	4.08429	2.76269	1.2607	0.547348	0.564012	6.03415e-16	2.97718e-15	8.58391
ENSG00000073756	PTGS2	protein_coding	5265	1.86167	1.29547	0.406947	0.559714	0.523125	3.82486e-17	2.31822e-16	8.58834
ENSG00000161800	RACGAP1	protein_coding	4487	3.72671	2.43451	1.11216	0.652478	0.61427	1.04224e-14	4.29114e-14	8.58874
ENSG00000106484	MEST	protein_coding	4767	1.286	1.03921	0.167081	0.336225	0.307408	9.74285e-29	1.71073e-27	8.6109
ENSG00000110492	MDK	protein_coding	2196	2.67701	1.83898	0.854779	0.503312	0.541712	9.37317e-17	5.38056e-16	8.68262
ENSG00000170312	CDK1	protein_coding	3931	3.59505	2.33373	1.04719	0.699901	0.623374	4.07945e-15	1.80403e-14	8.96998
ENSG00000163902	RPN1	protein_coding	3965	7.06802	4.94062	1.86628	0.443153	0.516615	3.5949e-18	2.4811e-17	9.01199
ENSG00000122952	ZWINT	protein_coding	2377	3.67426	2.53374	1.1542	0.558642	0.536184	7.99922e-18	5.33579e-17	9.16712
ENSG00000108671	PSMD11	protein_coding	7083	4.78309	3.40536	1.4857	0.413076	0.490138	1.44473e-19	1.18966e-18	9.2343
ENSG00000133169	BEX1	protein_coding	795	1.44241	1.0784	0.242595	0.415624	0.41959	4.2498e-23	5.17782e-22	9.38691
ENSG00000151388	ADAMTS12	protein_coding	9605	1.36568	1.09037	0.244325	0.334099	0.324805	1.02069e-29	1.99787e-28	9.41646
ENSG00000139926	FRMD6	protein_coding	9416	10.1926	6.70622	2.15017	0.591613	0.603944	2.20587e-16	1.18108e-15	9.4556
ENSG00000143621	ILF2	protein_coding	2261	8.12408	5.77723	2.02687	0.377038	0.491827	5.06216e-20	4.3173e-19	9.49013
ENSG00000155660	PDIA4	protein_coding	3298	4.31122	2.9157	1.32889	0.539385	0.564253	1.37953e-17	8.85566e-17	9.51346
ENSG00000108219	TSPAN14	protein_coding	17889	1.48354	1.11696	0.310485	0.375083	0.409465	4.80688e-24	6.37713e-23	9.54796
ENSG00000180801	ARSJ	protein_coding	5146	2.40803	1.66474	0.751638	0.496243	0.532555	7.53492e-19	5.58801e-18	9.65146
ENSG00000115053	NCL	protein_coding	6819	6.19699	4.26765	1.71839	0.479315	0.538127	8.55448e-19	6.30497e-18	9.72278
ENSG00000116016	EPAS1	protein_coding	7291	3.48062	2.21951	1.0161	0.660123	0.649103	9.04164e-16	4.35311e-15	9.76494
ENSG00000175063	UBE2C	protein_coding	1286	4.26239	2.75156	1.21475	0.689744	0.63141	3.28751e-16	1.72161e-15	9.77621
ENSG00000011426	ANLN	protein_coding	5997	4.63219	2.91476	1.2728	0.748243	0.66832	1.79976e-15	8.32912e-15	9.85423
ENSG00000104738	MCM4	protein_coding	6973	3.51734	2.33307	1.08784	0.582075	0.592254	2.17652e-17	1.36777e-16	9.86828
ENSG00000049130	KITLG	protein_coding	6205	2.86866	1.79534	0.828004	0.652149	0.676123	1.3447e-15	6.30259e-15	10.0549
ENSG00000158164	TMSB15A	protein_coding	634	1.23928	1.01823	0.175972	0.25401	0.283437	7.55441e-37	2.37367e-35	10.2383
ENSG00000145147	SLIT2	protein_coding	11067	2.4681	1.64308	0.764339	0.525782	0.586995	3.30672e-18	2.29548e-17	10.261
ENSG00000116729	WLS	protein_coding	4459	1.78446	1.28852	0.476338	0.427397	0.46977	1.38633e-22	1.56158e-21	10.2683
ENSG00000184226	PCDH9	protein_coding	30944	1.54683	1.09097	0.282051	0.468361	0.503705	4.03036e-21	3.75957e-20	10.2729
ENSG00000164211	STARD4	protein_coding	5684	1.83885	1.25583	0.475452	0.484912	0.55016	1.97119e-19	1.61206e-18	10.2909
ENSG00000146197	SCUBE3	protein_coding	7819	2.58416	1.62841	0.671765	0.677216	0.666233	2.95169e-16	1.55256e-15	10.3465
ENSG00000145050	MANF	protein_coding	2139	4.19128	2.93133	1.32579	0.485291	0.515834	8.19635e-21	7.47056e-20	10.3612
ENSG00000077152	UBE2T	protein_coding	1652	2.91302	1.99076	0.942479	0.497112	0.549194	1.08121e-19	9.02775e-19	10.4161
ENSG00000166482	MFAP4	protein_coding	2152	3.08577	1.89951	0.877192	0.661288	0.700007	9.09641e-16	4.36189e-15	10.5289
ENSG00000076382	SPAG5	protein_coding	5218	2.14637	1.43803	0.588561	0.564422	0.577806	4.62345e-19	3.58468e-18	10.5941
ENSG00000112984	KIF20A	protein_coding	3852	2.13678	1.42133	0.552681	0.591139	0.588199	9.11344e-19	6.67574e-18	10.6113
ENSG00000146731	CCT6A	protein_coding	3846	5.3877	3.76889	1.60851	0.405178	0.51553	2.15747e-21	2.06082e-20	10.654
ENSG00000161638	ITGA5	protein_coding	7383	4.29695	2.51798	1.19319	0.728945	0.771043	8.14487e-15	3.38849e-14	10.8633
ENSG00000122786	CALD1	protein_coding	9844	13.1512	9.07199	2.48559	0.434449	0.535704	4.19625e-21	3.85634e-20	10.9161
ENSG00000021645	NRXN3	protein_coding	15533	1.33571	1.02971	0.201959	0.356346	0.375375	8.16723e-30	1.63259e-28	10.9189
ENSG00000198682	PAPSS2	protein_coding	4083	2.16705	1.50034	0.661996	0.45899	0.530444	4.06204e-22	4.1811e-21	11.3469
ENSG00000197061	H4C3	protein_coding	435	18.0219	10.3961	2.54852	0.869312	0.793714	4.871e-15	2.10724e-14	11.3599
ENSG00000072110	ACTN1	protein_coding	10626	11.2674	6.2839	2.12662	0.794285	0.842419	3.15818e-14	1.21641e-13	11.3731
ENSG00000114251	WNT5A	protein_coding	7397	1.73302	1.2277	0.447873	0.42838	0.497325	5.30103e-24	6.87982e-23	11.5756
ENSG00000134057	CCNB1	protein_coding	2433	4.02338	2.42239	1.08634	0.745874	0.731975	1.04123e-16	5.92015e-16	11.6988
ENSG00000166508	MCM7	protein_coding	4386	5.46624	3.40347	1.46416	0.726579	0.683544	6.45987e-18	4.38243e-17	11.75
ENSG00000173530	TNFRSF10D	protein_coding	3535	2.33922	1.58065	0.711645	0.516354	0.565515	1.16728e-21	1.14241e-20	11.8378
ENSG00000178999	AURKB	protein_coding	2241	3.31388	2.10028	1.01169	0.619662	0.657937	6.50732e-19	4.85608e-18	11.9656
ENSG00000144381	HSPD1	protein_coding	4123	4.17393	2.86224	1.33428	0.460087	0.54426	9.72947e-23	1.13892e-21	11.9802
ENSG00000186480	INSIG1	protein_coding	3650	3.41243	2.21179	1.05085	0.579166	0.625584	5.16909e-20	4.37723e-19	12.0654
ENSG00000148834	GSTO1	protein_coding	1691	7.61593	5.22825	1.94999	0.418147	0.542693	4.46443e-23	5.38438e-22	12.1293
ENSG00000164176	EDIL3	protein_coding	5825	1.75219	1.23383	0.438511	0.463709	0.506017	3.63771e-25	4.99245e-24	12.3666
ENSG00000170558	CDH2	protein_coding	4634	2.78593	1.86696	0.905774	0.491065	0.577468	1.47427e-22	1.64512e-21	12.6069
ENSG00000196230	TUBB	protein_coding	3208	18.199	11.8895	2.78793	0.517513	0.614176	3.60722e-22	3.77809e-21	13.1697
ENSG00000182195	LDOC1	protein_coding	4983	1.70199	1.26865	0.471209	0.336668	0.423929	4.49423e-32	1.07971e-30	13.289
ENSG00000130176	CNN1	protein_coding	2837	1.69665	1.22646	0.435225	0.412646	0.468193	2.3299e-29	4.34672e-28	13.4056
ENSG00000182481	KPNA2	protein_coding	2963	9.48781	5.83296	2.0536	0.638476	0.701848	4.69107e-20	4.0296e-19	13.5658
ENSG00000131238	PPT1	protein_coding	5088	2.84992	1.85219	0.923281	0.492936	0.621693	5.91299e-23	7.06011e-22	13.8191
ENSG00000145386	CCNA2	protein_coding	2798	3.04097	1.93573	0.944898	0.580241	0.651654	4.66246e-22	4.7581e-21	13.9007
ENSG00000089685	BIRC5	protein_coding	3815	3.93065	2.42276	1.19362	0.615054	0.698117	1.20091e-21	1.16576e-20	14.6049
ENSG00000143401	ANP32E	protein_coding	3605	3.21942	1.94182	0.972218	0.616347	0.729395	1.92709e-21	1.8556e-20	15.1095
ENSG00000169908	TM4SF1	protein_coding	3495	3.61697	2.10773	1.02652	0.705517	0.779095	2.04846e-20	1.81175e-19	15.3393
ENSG00000134184	GSTM1	protein_coding	2512	1.22392	1.00083	0.164126	0.251343	0.290306	2.63864e-55	2.42349e-53	15.8445
ENSG00000176887	SOX11	protein_coding	9002	1.63254	1.11226	0.382714	0.426603	0.553621	1.43315e-29	2.71615e-28	15.9685
ENSG00000164032	H2AZ1	protein_coding	2270	13.3679	7.929	2.44108	0.581706	0.753562	5.71854e-22	5.78639e-21	16.0077
ENSG00000111859	NEDD9	protein_coding	10359	1.64424	1.1041	0.376062	0.449042	0.574552	8.69875e-29	1.56465e-27	16.1223
ENSG00000167900	TK1	protein_coding	1845	6.92115	4.06929	1.78111	0.581676	0.766237	3.87592e-23	4.77098e-22	17.1726
ENSG00000164932	CTHRC1	protein_coding	1745	6.94094	4.16937	1.81128	0.510959	0.735302	3.47002e-24	4.65529e-23	17.2499
ENSG00000162595	DIRAS3	protein_coding	2049	2.10248	1.25578	0.491409	0.614231	0.74351	4.8767e-24	6.39866e-23	17.3326
ENSG00000050165	DKK3	protein_coding	11958	6.44943	3.66704	1.67134	0.648027	0.814555	3.69541e-22	3.8368e-21	17.4578
ENSG00000060982	BCAT1	protein_coding	11415	5.64465	3.21732	1.54217	0.645821	0.811025	1.85875e-22	2.0361e-21	17.6242
ENSG00000117399	CDC20	protein_coding	2012	3.18739	1.8793	0.938699	0.647071	0.76218	6.44865e-24	8.27924e-23	17.6754
ENSG00000187688	TRPV2	protein_coding	3381	1.44604	1.02838	0.282391	0.386029	0.491735	6.40876e-37	2.06813e-35	17.7975
ENSG00000133026	MYH10	protein_coding	9011	2.45702	1.52254	0.749107	0.532956	0.690432	2.15402e-27	3.62239e-26	18.4116
ENSG00000175183	CSRP2	protein_coding	5842	2.05539	1.34799	0.61662	0.439875	0.608599	3.05037e-31	6.68285e-30	18.5718
ENSG00000166851	PLK1	protein_coding	4760	3.03996	1.71287	0.857528	0.677619	0.827636	2.40395e-25	3.33758e-24	20.3756
ENSG00000137801	THBS1	protein_coding	9158	11.3217	5.89973	2.12146	0.806812	0.940367	1.15666e-22	1.31529e-21	20.6286
ENSG00000107796	ACTA2	protein_coding	2976	10.9016	5.52389	2.06426	0.797132	0.980786	2.76178e-22	2.92934e-21	21.1446
ENSG00000168268	NT5DC2	protein_coding	4799	2.52435	1.52357	0.776937	0.506946	0.728455	1.30286e-30	2.77787e-29	21.77
ENSG00000170961	HAS2	protein_coding	4240	5.44719	2.71776	1.39121	0.782798	1.00309	1.12067e-22	1.28661e-21	22.0184
ENSG00000118785	SPP1	protein_coding	2321	1.77862	1.10354	0.408511	0.506467	0.688617	9.99906e-33	2.48727e-31	22.0358
ENSG00000103187	COTL1	protein_coding	6761	4.87801	2.80976	1.45347	0.500613	0.795848	8.77985e-29	1.56465e-27	22.3287
ENSG00000171848	RRM2	protein_coding	9155	5.54189	2.93809	1.48519	0.708013	0.915502	2.99905e-26	4.53275e-25	23.3664
ENSG00000117519	CNN3	protein_coding	2783	8.89138	5.54704	2.12282	0.37096	0.680689	1.49828e-35	4.16035e-34	23.7046
ENSG00000104722	NEFM	protein_coding	3635	1.46307	1.00096	0.262284	0.423352	0.54762	6.67242e-46	3.18675e-44	24.7391
ENSG00000118971	CCND2	protein_coding	7170	1.41154	1.00485	0.252793	0.382211	0.49028	2.11831e-51	1.33119e-49	24.8444
ENSG00000164308	ERAP2	protein_coding	6953	1.3963	1.01574	0.274885	0.326383	0.45907	6.72203e-55	5.73293e-53	24.869
ENSG00000164934	DCAF13	protein_coding	9199	3.76957	2.15316	1.20903	0.506308	0.807945	1.76971e-33	4.49582e-32	26.4619
ENSG00000131016	AKAP12	protein_coding	8775	2.20218	1.30617	0.649542	0.500509	0.753589	3.64882e-36	1.03731e-34	26.7056
ENSG00000122641	INHBA	protein_coding	8284	4.5219	2.39318	1.32667	0.607749	0.918002	7.69391e-30	1.58388e-28	26.7266
ENSG00000135074	ADAM19	protein_coding	7704	1.64316	1.10883	0.430333	0.34993	0.567437	4.12644e-49	2.46348e-47	27.4551
ENSG00000182287	AP1S2	protein_coding	5428	2.95531	1.53563	0.909852	0.593792	0.944484	1.84469e-30	3.86413e-29	28.0834
ENSG00000107438	PDLIM1	protein_coding	2227	3.07752	1.78607	1.02676	0.452251	0.784985	1.11752e-36	3.33579e-35	28.2216
ENSG00000164220	F2RL2	protein_coding	3408	1.65327	1.0402	0.355841	0.476099	0.668455	2.67699e-48	1.45287e-46	31.8
ENSG00000159674	SPON2	protein_coding	5985	5.05084	2.07353	1.25457	0.851684	1.28444	8.22655e-26	1.18343e-24	32.2198
ENSG00000166396	SERPINB7	protein_coding	2637	1.77064	1.0932	0.449862	0.462697	0.69571	1.17576e-47	6.10371e-46	32.6495
ENSG00000181104	F2R	protein_coding	3972	2.85344	1.4135	0.846657	0.6036	1.01343	9.71206e-37	2.97338e-35	36.4963
ENSG00000111057	KRT18	protein_coding	3069	1.63952	1.02499	0.358295	0.454878	0.677667	3.86587e-57	4.61585e-55	38.229
ENSG00000168542	COL3A1	protein_coding	6758	7.60931	2.80236	1.62619	0.87111	1.44112	7.75175e-32	1.81482e-30	44.8342
ENSG00000143013	LMO4	protein_coding	5421	2.94414	1.44894	0.943007	0.515717	1.02285	3.28293e-46	1.63326e-44	46.5231
ENSG00000149968	MMP3	protein_coding	1854	7.2279	3.1272	1.57934	0.891109	1.20871	2.98113e-39	1.08284e-37	46.5662
ENSG00000013297	CLDN11	protein_coding	3732	7.22927	3.14244	1.79821	0.612343	1.20196	3.50419e-42	1.49429e-40	49.8279
ENSG00000134013	LOXL2	protein_coding	5985	4.49519	1.74691	1.1904	0.751605	1.36358	5.58898e-38	1.96272e-36	50.7969
ENSG00000213190	MLLT11	protein_coding	2483	3.03975	1.38639	0.953063	0.562232	1.13262	9.09974e-49	5.17385e-47	54.4123
ENSG00000166922	SCG5	protein_coding	2196	2.44328	1.12182	0.694053	0.603619	1.12298	1.05994e-52	7.90983e-51	58.3667
ENSG00000196549	MME	protein_coding	9620	3.21393	1.36426	0.971401	0.606014	1.23622	2.46926e-52	1.73429e-50	63.7984
ENSG00000111348	ARHGDIB	protein_coding	2042	2.92299	1.19501	0.908573	0.570113	1.29043	1.77596e-69	3.53417e-67	88.7176
ENSG00000197632	SERPINB2	protein_coding	2741	3.39584	1.21539	0.858573	0.784854	1.48236	4.89741e-62	7.30938e-60	90.8833
ENSG00000135218	CD36	protein_coding	10880	3.09276	1.00458	0.649585	0.83287	1.62231	3.25969e-71	7.78414e-69	114.351
ENSG00000196611	MMP1	protein_coding	1971	33.2362	4.6655	3.22588	0.817237	2.83265	3.48273e-73	1.30015e-70	205.249
ENSG00000133110	POSTN	protein_coding	5464	17.7552	1.61101	2.47261	0.923076	3.46221	3.84587e-85	2.29598e-82	292.262
